Tano, D. W. *et al.*, 2022

## Multiple pathways mediate chloroplast singlet oxygen stress signaling

David W. Tano, Marta A. Kozłowska, Robert A. Easter, and Jesse D. Woodson\*

The School of Plant Sciences, University of Arizona, Tucson, AZ.

\*Address correspondence to:

Dr. Jesse D. Woodson

303 Forbes Hall

1140 E. South Campus Drive

University of Arizona

Tucson, AZ 85721-0036

Phone: (520) 621-3970

[jessewoodson@email.arizona.edu](mailto:jessewoodson@email.arizona.edu)

Current email addresses: DWT; [stroshein@gmail.com](mailto:stroshein@gmail.com) MAK; [16kozłowska.m@gmail.com](mailto:16kozłowska.m@gmail.com), RE; [beardown8591@gmail.com](mailto:beardown8591@gmail.com).

ORCID: DWT; 0000-0001-5604-1141, MAK; 0000-0001-9070-8974, JDW; 0000-0002-5463-5146

**Total word count of main text (excluding abstract and figure legends): 10,313**

Abstract: 229

Introduction: 1810

Materials and Methods: 2420

Results: 3906

Discussion/Conclusions: 2177

Figure legends: 1230

Number of figures: 7

Number of tables: 0

Number of supplemental figures: 9

Number of supplemental tables: 20

Key message (30 words): Chloroplast singlet oxygen initiates multiple pathways to control chloroplast degradation, cell death, and nuclear gene expression.

**Key words:** abiotic stress, cellular degradation, chloroplast, photosynthesis, reactive oxygen species, signaling.

Tano, D. W. *et al.*, 2022

1 **Abstract:**

2 Chloroplasts can respond to stress and changes in the environment by producing reactive oxygen species (ROS). Aside  
3 from being cytotoxic, ROS also have signaling capabilities. For example, the ROS singlet oxygen ( $^1\text{O}_2$ ) can initiate  
4 nuclear gene expression, chloroplast degradation, and cell death. To unveil the signaling mechanisms involved,  
5 researchers have used several  $^1\text{O}_2$ -producing *Arabidopsis thaliana* mutants as genetic model systems, including *plastid*  
6 *ferrochelatase two (fc2)*, *fluorescent in blue light (flu)*, *chlorina 1 (chl)*, and *accelerated cell death 2 (acd2)*. Here,  
7 we compare these  $^1\text{O}_2$ -producing mutants to elucidate if they utilize one or more signaling pathways to control cell  
8 death and nuclear gene expression. Using publicly available transcriptomic data, we demonstrate *fc2*, *flu*, and *chl*  
9 share a core response to  $^1\text{O}_2$  accumulation, but maintain unique responses, potentially tailored to respond to their  
10 specific stresses. Subsequently, we used a genetic approach to determine if these mutants share  $^1\text{O}_2$  signaling pathways  
11 by testing the ability of genetic suppressors of one  $^1\text{O}_2$  producing mutant to suppress signaling in a different  $^1\text{O}_2$   
12 producing mutant. Our genetic analyses revealed at least two different chloroplast  $^1\text{O}_2$  signaling pathways control  
13 cellular degradation: one specific to the *flu* mutant and one shared by *fc2*, *chl*, and *acd2* mutants, but with life-stage-  
14 specific (seedling vs. adult) features. Overall, this work reveals chloroplast stress signaling involving  $^1\text{O}_2$  is complex  
15 and may allow cells to finely tune their physiology to environmental inputs.

16

Tano, D. W. *et al.*, 2022

## 17 **Introduction**

18 Plants experience a variety of cellular stresses, such as reactive oxygen species (ROS) produced within their  
19 energy-producing organelles (i.e., chloroplasts and mitochondria). Within chloroplasts during photosynthesis,  
20 harnessed light energy can lead to ROS production, causing damage to nearby macromolecules (e.g., lipids, proteins,  
21 DNA). Plants detoxify ROS through several enzymatic and non-enzymatic mechanisms (e.g., ROS scavenging  
22 enzymes, antioxidant production) (Apel et al. 2004; Noctor et al. 2018). However, these safety measures can be  
23 overwhelmed, especially under various environmental stresses including excess light (EL) (Triantaphylides et al.  
24 2008), drought (Chan et al. 2016), salinity (Suo et al. 2017), and pathogen attack (Lu et al. 2018).

25 Photosynthesis produces the ROS hydrogen peroxide (H<sub>2</sub>O<sub>2</sub>) and superoxide (O<sub>2</sub><sup>-</sup>) primarily at Photosystem  
26 I (PSI) and singlet oxygen (<sup>1</sup>O<sub>2</sub>) primarily at Photosystem II (PSII) (Asada 2006; Triantaphylides et al. 2008). These  
27 molecules can inhibit photosynthesis by causing photo-oxidative damage to photosynthetic machinery leading to  
28 photoinhibition (Asada 2006). Although ROS are cytotoxic molecules, they can report on a plant's current  
29 environment (Chan et al. 2015; Foyer 2018; Mittler 2017). For instance, <sup>1</sup>O<sub>2</sub> can lead to signals that initiate cellular  
30 degradation (chloroplast degradation and cell death) and nuclear gene reprogramming via retrograde (chloroplast-to-  
31 nucleus) signaling (D'Alessandro et al. 2020; Dogra et al. 2019; Woodson 2022). As <sup>1</sup>O<sub>2</sub> has an extremely short half-  
32 life (~0.5 – 1.0 μsec (Ogilby 2010)), the bulk of chloroplast <sup>1</sup>O<sub>2</sub> likely remains within the organelle of origin. Thus,  
33 secondary messengers are likely involved in propagating the chloroplast <sup>1</sup>O<sub>2</sub> signal(s) to affect nuclear gene expression  
34 and cellular degradation (Dogra et al. 2019; Woodson 2022). Researchers have discovered several signaling factors,  
35 but their mechanisms still remain mostly unclear.

36 A major challenge in deciphering ROS signaling in plant cells is that natural stresses can lead to the  
37 production of multiple types of ROS (Noctor et al. 2014; Pospíšil 2016) in multiple sub-cellular compartments  
38 (Choudhury et al. 2017; Rosenwasser et al. 2013). To specifically understand how <sup>1</sup>O<sub>2</sub> signals, researchers use several  
39 *Arabidopsis thaliana* mutants that conditionally accumulate chloroplast <sup>1</sup>O<sub>2</sub> under specific growth conditions to  
40 dissect the genetic and biochemical attributes of <sup>1</sup>O<sub>2</sub> signaling pathways. The *fluorescent in blue light (flu-1*, referred  
41 to as *flu* henceforth) mutant was one of the first <sup>1</sup>O<sub>2</sub>-producing mutants described (Meskauskiene et al. 2001). The *flu*  
42 mutant over-accumulates the tetrapyrrole (e.g., chlorophyll and heme) intermediate protochlorophyllide (Pchl<sub>id</sub>)  
43 when grown in the dark. When the mutant is exposed to light, the energized Pchl<sub>id</sub> (like other free tetrapyrroles)  
44 reacts with nearby ground-state oxygen (<sup>3</sup>O<sub>2</sub>) to produce <sup>1</sup>O<sub>2</sub> within the thylakoid membranes (Wang et al. 2016). This

Tano, D. W. *et al.*, 2022

45 burst of  $^1\text{O}_2$  leads to the reprogramming of hundreds of genes in the nucleus through a retrograde signal, followed by  
46 initiation of bleaching and cell death (op den Camp et al. 2003; Wagner et al. 2004). A smaller set of 168 genes, called  
47 *Early Singlet Oxygen Response Genes (ESORGs)*, may represent the initial response (within 60 min) to chloroplast  
48  $^1\text{O}_2$  signals in *flu* mutants (Dogra et al. 2017). A forward genetic screen for signaling components in this pathway  
49 identified *EXECUTOR1 (EX1)* as playing an important role (Lee et al. 2007; Wagner et al. 2004). When an *ex1* loss  
50 of function mutation is introduced into the *flu* background, induction of nuclear gene expression and cell death (but  
51 not the accumulation of Pchl $^a$  or  $^1\text{O}_2$ ) is blocked. This breakthrough discovery was among the first evidence that  
52  $^1\text{O}_2$ -induced cell death and cellular degradation is due to a genetically encoded response rather than  $^1\text{O}_2$  toxicity.

53         Recent studies reveal EX1 may physically sense  $^1\text{O}_2$  in the grana margins (site of tetrapyrrole synthesis and  
54 photosystem II repair) through oxidation of tryptophan 643 in a domain of unknown function (DUF) (Dogra et al.  
55 2019). The chloroplast metalloprotease FtsH2 degrades this oxidized EX1 protein, which is necessary for EX1  
56 signaling (Dogra et al. 2017; Wang et al. 2016). These studies hypothesize an EX1 degradation peptide may act as a  
57 signaling factor. A conserved homolog of EX1, EX2 plays a role in  $^1\text{O}_2$  signaling (Lee et al. 2007; Page et al. 2017).  
58 Like EX1, EX2 undergoes oxidation by  $^1\text{O}_2$  at a conserved tryptophan residue and is subsequently degraded by FtsH2.  
59 However, degraded EX2 does not initiate retrograde signaling and cell death like EX1 (Dogra et al. 2022). Thus, EX2  
60 may act as a decoy to protect EX1 and attenuate  $^1\text{O}_2$  signals to prevent excessive responses. Researchers also  
61 demonstrated, using *flu* protoplasts, the blue light photoreceptor CRYPTOCHROME 1 (CRY1) is involved in  
62 transducing the  $^1\text{O}_2$  cell death signal, leading to the possibility that blue light is involved in chloroplast stress signaling  
63 (Danon et al. 2006). However, such a signal only represents part of the  $^1\text{O}_2$  response as the impact of *cry1* on  $^1\text{O}_2$ -  
64 induced nuclear gene expression is limited.

65         A second  $^1\text{O}_2$  over-producing mutant is *chlorina 1 (chl-1)*, referred to as *chl* henceforth). This mutant lacks  
66 chlorophyll b and does not have a properly functioning/assembled photosystem II antennae complex that could protect  
67 the reaction center and quench  $^1\text{O}_2$  (Ramel et al. 2013). When *chl* is grown under EL conditions ( $\geq 1,100 \mu\text{mol photons}$   
68  $\text{m}^{-2} \text{sec}^{-1}$ ), PSII accumulates  $^1\text{O}_2$  in its reaction center located in the grana core. As in the *flu* mutant, the  $^1\text{O}_2$  initiates  
69 retrograde signaling to the nucleus and causes cell death. When *chl* mutants experience a mild level of photo-oxidative  
70 stress ( $\geq 450 \mu\text{mol photons m}^{-2} \text{sec}^{-1}$ ) prior to EL treatments, they are more tolerant to subsequent EL stress, suggesting  
71 low levels of  $^1\text{O}_2$  can lead to stress acclimation (Ramel et al. 2013; Shumbe et al. 2017). In the case of the *chl* mutant,  
72 EX1 and EX2 appear to be dispensable for  $^1\text{O}_2$  signaling (a *chl ex1 ex2* mutant still experiences cell death under EL

Tano, D. W. *et al.*, 2022

73 stress) (Ramel et al. 2013). Instead,  $^1\text{O}_2$ -triggered nuclear gene expression and cell death depends on oxidative signal  
74 inducible 1 (OXI1), a nuclear-localized serine/threonine kinase originally identified for its role in pathogen defense  
75 (Shumbe et al. 2016). Furthermore, accumulation of volatile carotenoid oxidation products (e.g.,  $\beta$ -cyclocitral ( $\beta$ -cc))  
76 produced by  $^1\text{O}_2$  accumulation at PSII are another part of this response (Ramel et al. 2012; Shumbe et al. 2014).  
77 Interestingly, signals induced by  $\beta$ -cc trigger nuclear gene expression and acclimation, but do not cause cellular  
78 degradation (Ramel et al. 2012). As such, we hypothesize that  $^1\text{O}_2$  signaling is a complex network controlling multiple  
79 physiological responses in the cell.

80 A third  $^1\text{O}_2$ -producing mutant is *accelerated cell death 2* (*acd2-2*, referred to as *acd2* henceforth). This mutant  
81 experiences  $^1\text{O}_2$  bursts when grown under standard growth light conditions and produces seemingly random cell death  
82 lesions that spread across leaves (Mach et al. 2001). The *acd2* mutant accumulates the chlorophyll breakdown  
83 intermediate, red chlorophyll catabolite (RCC) (Pruzinská et al. 2007). Similarly to Pchl<sub>ide</sub> accumulated in *flu*  
84 mutants, photosensitive RCC can absorb light energy and produce  $^1\text{O}_2$  in the cell (Pattanayak et al. 2012; Pruzinská  
85 et al. 2007). While the bulk (if not all)  $^1\text{O}_2$  in *flu* and *chl* mutants likely accumulates in chloroplasts (the grana margins  
86 and the grana cores, respectively), the *acd2* mutants produce at least some  $^1\text{O}_2$  in the mitochondria. Previous work did  
87 not reveal how this  $^1\text{O}_2$  may signal or lead to cell death, but this pathway acts independently of EX signaling (*acd2*  
88 *ex1 ex2* mutants have similar lesion formation as *acd2*) (Pattanayak et al. 2012).

89 In addition to cell death and retrograde signaling,  $^1\text{O}_2$  can lead to chloroplast degradation. *plastid*  
90 *ferrochelatase two* (*fc2*) mutants accumulate the tetrapyrrole intermediate protoporphyrin-IX (Proto) immediately  
91 after dawn (Papenbrock et al. 2001; Woodson et al. 2015). Like Pchl<sub>ide</sub>, Proto absorbs light energy and produces  $^1\text{O}_2$ .  
92 The  $^1\text{O}_2$  leads to chloroplast degradation, retrograde signaling, and eventually cell death (Woodson et al. 2015). Even  
93 under permissive constant light conditions, a subset of chloroplasts (up to 35%) are selectively degraded in otherwise  
94 healthy cells, likely due to moderately high levels of Proto and  $^1\text{O}_2$  (Fisher et al. 2022). To understand the molecular  
95 signal in the *fc2* mutant, we previously conducted a forward genetic screen to identify suppressors of  $^1\text{O}_2$ -triggered  
96 cell death and identified 24 *ferrochelatase two suppressor* (*fts*) mutations that allow *fc2-1* (hereafter referred to as *fc2*)  
97 seedlings to survive under diurnal cycling light conditions (Woodson et al. 2015).

98 When we cloned these *fts* mutants, we identified an important role for plastid gene expression in initiating  
99 the  $^1\text{O}_2$  signal in *fc2* chloroplasts. Mutations affecting *PENTATRICOPEPTIDE REPEAT CONTAINING PROTEIN*  
100 *30* (*PPR30*) or “*MITOCHONDRIAL*” *TRANSCRIPTIONAL TERMINATION FACTOR 9* (*mTERF9*) block cell death

Tano, D. W. *et al.*, 2022

101 and the induction of nuclear stress genes when  $^1\text{O}_2$  accumulates in chloroplasts (Alamdari et al. 2020). These mutations  
102 lead to a broad reduction of plastid-encoded RNA-polymerase (PEP)-encoded transcripts, which is likely due to the  
103 predicted functions of PPR and mTERF proteins in post-transcriptional gene expression within plastids (Barkan et al.  
104 2014; Wobbe 2020). In addition, we identified a third gene, *CYTIDINE TRIPHOSPHATE SYNTHASE 2 (CTPS2)*,  
105 that is necessary for  $^1\text{O}_2$  signaling in the *fc2* mutant (Alamdari et al. 2021). *ctps2* mutants are deficient in chloroplast  
106 dCTP, leading to reduced chloroplast DNA content and plastid transcripts. Based on these mutations decreasing plastid  
107 gene expression, we hypothesized that a chloroplast-encoded protein (or RNA) is essential for the *fc2*  $^1\text{O}_2$  signaling  
108 pathway (Woodson 2022).

109         The same genetic screen revealed the cellular ubiquitination machinery is involved with  $^1\text{O}_2$  signaling in *fc2*  
110 mutants. *FTS29* encodes the cytoplasmic plant U-box E3 ubiquitin ligase (PUB4) protein, which is necessary to induce  
111  $^1\text{O}_2$ -dependent cell death (Woodson et al. 2015). As an E3 ligase, PUB4 is likely responsible for controlling the  
112 placement of ubiquitination modifications on a group of proteins in the cell (Callis 2014). Although its targets are  
113 unknown,  $^1\text{O}_2$ -stressed chloroplasts do accumulate ubiquitin-tagged proteins. Thus, PUB4 may lead (directly or  
114 indirectly) to the ubiquitination of proteins associated with the chloroplast envelope during  $^1\text{O}_2$  and photo-oxidative  
115 stress (Jeran et al. 2021; Woodson et al. 2015). Together, these conclusions suggest posttranslational modifications  
116 are a possible mechanism a cell could use to identify damaged chloroplasts for turnover or repair (Woodson 2019).

117         Although researchers have identified several signaling  $^1\text{O}_2$  factors, they primarily study these components in  
118 the  $^1\text{O}_2$  accumulating genetic backgrounds in which they were identified. Presently, some evidence suggests these  
119 pathways are independent; *ex1* does not suppress cell death in the *fc2* (Woodson et al. 2015), *chl* (Ramel et al. 2013),  
120 or *acd2* mutants (Pattanayak et al. 2012). As such, we hypothesize that multiple chloroplast  $^1\text{O}_2$  signaling pathways  
121 exist to control cellular degradation and nuclear gene expression. Here, we compare the *fc2*, *flu*, *chl*, and *acd2* mutants  
122 to test if they elicit separate chloroplast signals. A meta-analysis of transcriptional responses in these mutants suggests  
123 a core response with unique signatures exists. However, a genetic analysis of these mutants and their suppressors  
124 revealed two major  $^1\text{O}_2$  signaling pathways. The *flu* mutant likely uses one distinct EX-dependent signal, while *fc2*,  
125 *chl*, and *acd2* share a second  $^1\text{O}_2$  signaling pathway with life-stage-specific (seedling vs. adult) features. Together  
126 these results demonstrate chloroplast  $^1\text{O}_2$ -signaling is complex and may depend on the exact sites of  $^1\text{O}_2$  production,  
127 even within a single chloroplast.

128

Tano, D. W. *et al.*, 2022

129 **Methods**

130 **Biological material, growth conditions, and treatments**

131 The Arabidopsis ecotype *Columbia* (Col-0) was used as wt and the genetic background for all lines. Mutant  
132 lines used in this study are listed in Table S1. The *fc2-1* T-DNA insertion line (GABI\_766H08) (Woodson et al. 2011)  
133 and the *oxi1* T-DNA insertion line (GABI\_355H08) (Camehl et al. 2011) used were from the GABI (Kleinboelting et  
134 al. 2012) T-DNA collections and were described previously. The *ex1* (SALK\_002088), *ex2-2* (SALK\_021694), and  
135 *ex2-3* (SALK\_121009) T-DNA insertion lines used were from the SALK T-DNA collections (Alonso et al. 2003).  
136 SALK\_002088 (Lee et al. 2007) and SALK\_021694 (Uberegui et al. 2015) were previously described. The *cry1-304*  
137 (Bruggemann et al. 1996), *pub4-6* (Woodson et al. 2015), *acd2-2* (Mach et al. 2001), *flu-1* (Meskauskiene et al. 2001),  
138 *ppr30-1* (Alamdari et al. 2020), and *chl-1* (Havaux et al. 2007) mutants were described previously. Higher order  
139 mutant combinations were generated by crossing and confirmed by PCR genotyping where applicable (primer  
140 sequences listed in Table S2).

141 Seeds were surface sterilized and plated using one of two methods; 1) a previously described liquid bleach  
142 washing protocol (Alamdari et al. 2020). Briefly, seeds were washed in 30% bleach with 0.04% Triton X-100 (v/v) and  
143 then rinsed with sterile water three times by pelleting seeds at 3,500 x g for 1 min. 2) Chloride gas sterilization. For  
144 chloride gas surface sterilization, approximately 25-100  $\mu$ l of seed was placed in 2 mL microcentrifuge tubes and  
145 placed in an airtight chamber with their lids open. Five mL of concentrated HCl were added to 150 mL of bleach  
146 (3.33% v/v) and the lid to the chamber was put on immediately. Seeds were removed 24 h later and allowed to air out  
147 for 15 min before plating. Sterilization Method 1 was used for plants monitored or assayed in the seedling stage.  
148 Sterilization Method 2 was used for growing plants for bulking seed, genotyping, and adult-stage experiments. Seeds  
149 were plated on Linsmaier and Skoog medium pH 5.7 (Caisson Laboratories North Logan, UT) with 0.6%  
150 micropropagation type-1 agar powder. Seeds were stratified for 4 to 5 days in the dark at 4°C and were germinated in  
151 control conditions: constant white light ( $\sim 120 \mu\text{mol photons m}^{-2} \text{sec}^{-1}$ ) at 22°C. To initiate stress signaling in *fc2*  
152 mutant seedlings, plates were germinated under 6 h light / 18 h dark diurnal light cycling conditions. To initiate cell  
153 signaling in *flu* seedlings, plates were germinated under control conditions, shifted to the dark after 5 days for up to  
154 24 h (by wrapping in aluminum foil), and re-exposed to light.

155 To test adult phenotypes, seedlings were grown under seedling control conditions, transferred to soil, and  
156 grown under adult control conditions ( $100 \mu\text{mol photons m}^{-2} \text{sec}^{-1}$  of constant light at 22°C). To initiate stress signaling

Tano, D. W. *et al.*, 2022

157 in *fc2* and *flu* adult mutants, plants were shifted to 16 h light / 8 h dark diurnal light cycling conditions when 21 days  
158 old. Seeds used for experiments were harvested from plants of a similar age. Photosynthetically active radiation was  
159 measured using a LI-250A light meter with a LI-190R-BNC-2 Quantum Sensor (LiCOR). All above experiments were  
160 performed in chambers with cool white fluorescent bulbs.

161 To initiate and monitor EL signaling in seedlings, plants were grown as described above, but in a Percival  
162 LED-30L1 with white LED lights at 120  $\mu\text{mol photons m}^{-2} \text{sec}^{-1}$ . When 7 days old, the seedlings were then transferred  
163 to an EL chamber (a Percival LED 41L1 chamber with SB4X All-White SciBrite LED tiles) and exposed to 1,200  
164  $\mu\text{mol photons m}^{-2} \text{sec}^{-1}$  white light at 10°C for 24 h. Maximum PSII quantum yield ( $F_v/F_m$ ) was monitored in a  
165 FluorCam chamber (Closed FluorCam FC 800-C/1010-S, Photon Systems Instruments) as previously described  
166 (Lemke et al. 2021). For adult plants, seven-day-old seedlings were transferred to soil and grown under 70  $\mu\text{mol m}^{-2}$   
167  $\text{sec}^{-1}$  white light from LED panels until plants were 18 days old. The plants were then exposed to 1,300  $\mu\text{mol photons}$   
168  $\text{m}^{-2} \text{sec}^{-1}$  white light at 10°C in the EL chamber.  $F_v/F_m$  was monitored the same as for the seedlings.

169

#### 170 Transcriptome Data Analysis

171 Previously published microarray expression data was gathered from studies describing *fc2* (Woodson et al.  
172 2015), *flu* (op den Camp et al. 2003), *chl* (Ramel et al. 2013), and  $\beta$ -cc treated wt plants (Ramel et al. 2012). RNAseq  
173 data of *flu* mutant seedlings to identify ESORGs was from (Dogra et al. 2017). As the Affymetrix GeneChip  
174 Arabidopsis ATH1 Genome Array (*fc2* and *flu* datasets, Table S3) and the CATv5 microarray (*chl* and  $\beta$ -cc datasets,  
175 Table S4) have different gene coverage, only genes contained in both were used in the analysis. Gene groups  
176 recognized by a single probe were also removed as expression values could not be assigned to one specific gene.  
177 Finally, organellar gene transcript levels were removed from the analyses and only nuclear-encoded transcripts were  
178 considered. This left a total 19,895 genes for comparative analyses (Table S5).

179 Differentially expressed genes (DEGs) (induced or repressed) were identified from each dataset. For the *fc2*  
180 dataset, four-day-old etiolated wt and *fc2* seedlings were compared 2 h after light exposure (Table S6). For the *flu*  
181 dataset, wt and *flu* adult plants were compared after 8 h dark and 1 h light re-exposure (Table S7). For the *chl* dataset,  
182 *chl* adult plants were treated with 2 days of EL and compared to untreated *chl* (Table S8). For the  $\beta$ -cc treatment  
183 dataset, wt plants treated with  $\beta$ -cc for 4 h were compared to water-treated controls (Table S9). For these datasets, we  
184 applied cutoff values of  $\pm \geq 2$ -fold mean expression and adjusted (Bonferroni) p-value  $\leq 0.05$ . However, for the adult



Tano, D. W. *et al.*, 2022

185 *flu* mutant dataset (op den Camp et al. 2003), an unreported significance cutoff was already applied by the authors.  
186 For the ESORG dataset, *flu* seedlings were placed in the dark for 4 h and then exposed to 30 or 60 min of re-  
187 illumination and compared to *flu* seedlings without re-illumination. A list of 168 ESORGs were identified ( $\geq 2$ -fold  
188 induction,  $FDR \leq 0.05$  cutoffs) that overlapped with an earlier analysis of induced transcripts in the *flu* mutant (Chen  
189 et al. 2015) (Table S10). These gene lists were then compared using the program Venny 2.1 by Juan Carlos Oliveros  
190 (<https://bioinfoqg.cnb.csic.es/tools/venny/index.html>) (Oliveros (2007-2015)). Genes overlapping between mutants  
191 are listed in Tables S11 (up-regulated) and S12 (down-regulated), between mutants and  $\beta$ -cc treatment are listed in  
192 Tables S13 (up-regulated) and S14 (down-regulated), and between mutants and ESORGs are listed in Table S15.  
193 Table S16 displays additional details regarding plant growth, and RNA extraction/processing to generate the published  
194 datasets.

195

#### 196 Gene ontology enrichment analyses

197 Using gene lists from Tables S11-15, gene ontology (GO) terms were identified using GO::TermFinder  
198 (<https://go.princeton.edu/cgi-bin/GOTermFinder>) (Boyle et al. 2004) and GO terms were selected based on a p-value  
199  $\leq 0.01$ . Qualifying GO terms were exported to REVIGO for visualization (<http://revigo.irb.hr>) (Supek et al. 2011).

200

#### 201 Polymerase chain reactions and genotyping

202 Approximately 100 mg of fresh tissue was flash-frozen in liquid nitrogen for five min and crushed using 2  
203 silica beads in a Mini-BeadBeater (Biospec Products) for 1 min in 2 mL microcentrifuge tubes. DNA was extracted  
204 using 750  $\mu$ L of 2xCTAB (2% w/v) solution (1.4 M NaCl, 100 mM Tris-Cl pH 8.0, 20 mM EDTA) with 0.3% v/v  
205 beta-mercaptoethanol. Samples were incubated for 20-24 h at 65°C. Debris was pelleted for 5 min at 10,000 x g at  
206 room temperature. 700  $\mu$ L of the supernatant was moved to a clean tube and a 1:1 chloroform extraction was  
207 performed. Tubes were mixed for 2 min and left to rest for 5 min. Next, tubes were centrifuged for 10 min at 10,000  
208 x g to separate the aqueous and organic phases. 600  $\mu$ L of the aqueous layer was moved to a new tube containing 240  
209  $\mu$ L 5 M NaCl and 840  $\mu$ L of 100% isopropyl alcohol. Tubes were mixed for 2 min, incubated at room temperature for  
210 10 min, and incubated at 4°C for 24 h. DNA samples were pelleted for 30 min at 4°C at 21,000 x g. Two 1 mL 75%  
211 ethanol washes were performed, mixing the tubes by hand and pelleting for 2 min at 4°C at 21,000 x g, pouring the  
212 supernatant off each time. The tubes were spun at 21,000 x g for 30 seconds and the supernatant was removed. DNA

Tano, D. W. *et al.*, 2022

213 pellets were dried for 2 h in a laminar flow hood and resuspended in 75  $\mu$ L of DNase-free water, incubating for 24 h  
214 at 4°C.

215 PCR samples were amplified using GoTaq Green Master Mix (Promega) according to the manufacturer's  
216 instructions. 20  $\mu$ L reactions were performed, using 10  $\mu$ L of GoTaq Green Master Mix, 1  $\mu$ L of 10  $\mu$ M primer A, 1  
217  $\mu$ L of 10  $\mu$ M primer B, 6  $\mu$ L of sterile water, and 2  $\mu$ L of genomic DNA sample. For PCR samples not requiring  
218 restriction enzyme digestion (see below), DNA fragments were separated in a 1% (w/w) agarose gel containing 0.625  
219 mg/mL ethidium bromide for 30 min at 120 volts. Gels were imaged using a UV box. For unknown reasons, we were  
220 unable to amplify the left border of the *oxiI* T-DNA (*GABI\_355H08*) using primers specific to the left T-DNA border  
221 and the *OXII* sequence (JP1291/JP285). Instead, this mutation was confirmed by the inability to amplify wt *OXII*  
222 using the primer set JP1291/JP1292 and 100% resistance (no segregation) to 5  $\mu$ g/ml sulfadiazine (the antibiotic  
223 marker cassette in GABI T-DNA sequences).

224 For genotyping requiring a restriction enzyme digestion (dCAPs), 10  $\mu$ L digestions were performed. In a  
225 new tube, 5  $\mu$ L of PCR product, 4.4  $\mu$ L of nuclease-free water, 0.5  $\mu$ L of the appropriate 10x buffer, and 0.1  $\mu$ L of  
226 the appropriate enzyme were combined and mixed gently by hand. Samples were incubated at 37°C overnight. DNA  
227 fragments were separated in a 3% agarose gel containing 0.625 mg/mL ethidium bromide until the dye front was at  
228 the end of the gel. The gel was imaged using a UV box. Table S2 lists enzymes and expected fragment sizes.

229

### 230 RNA extraction and Real-time quantitative PCR

231 Total RNA extraction, cDNA synthesis, and RT-qPCR was performed as previously described (Alamdari et  
232 al. 2020), using the RNeasy Plant Mini Kit (Qiagen), Maxima first strand cDNA synthesis kit for RT-qPCR with  
233 DNase (Thermo Scientific), and the SYBR Green Master Mix (BioRad), respectively, according to the manufacturers'  
234 instructions. RT-qPCR experiments were all performed using a CFX Connect Real Time PCR Detection System (Bio-  
235 Rad). For expression analyses, all genes were normalized using *ACTIN2* as a standard. The primers used for RT-qPCR  
236 are presented in Table S2.

237

### 238 Chlorophyll measurements

239 Chlorophyll was measured as previously described (Alamdari et al. 2021). Briefly, seeds were stratified for  
240 5 days and counted prior to germination. Seedlings were collected 7 days after germination. Approximately 30-60

Tano, D. W. *et al.*, 2022

241 seedlings were used per seed line, and at least 3 biological replicates were collected for both constant light and diurnal  
242 cycling light conditions. Seedlings were flash-frozen in liquid nitrogen for 5 min and crushed using a Mini-BeadBeater  
243 (Biospec Products) for 1 min. Constant light samples were extracted in 1.2 mL of 100% ethanol, and diurnal light  
244 samples were extracted in 0.150 mL of 100% ethanol. Cell debris was pelleted and removed at 12,000 x g for 30 min  
245 at 4°C. The debris removal process was repeated twice before readings were taken. Chlorophyll was measured  
246 spectrophotometrically at 652 nm and 665 nm with a Varioskan LUX spectrophotometer with optically clear 96 well  
247 plates. Path corrections were calculated and chlorophyll concentrations were determined based on a previously  
248 described protocol (Warren 2008). Each biological replicate is a mean of 3 technical replicates. Total chlorophyll  
249 content was normalized to the number of seedlings collected.

250

#### 251 Protochlorophyllide measurements

252 Protochlorophyllide (Pchlde) was measured as previously described (Shin et al. 2009). Briefly, seeds were  
253 stratified for 4 days and counted prior to germination, which was initiated with 1 h of white light in control conditions.  
254 Seedlings were grown in the dark for 4 days at 22°C. Tissue (10 seedlings per replicate) was collected in dim green  
255 light and stored in amber 1.5 mL tubes containing 2 silica beads after flash-freezing with liquid nitrogen. Seedlings  
256 were crushed using a Mini-BeadBeater (Biospec Products) for 1 min. Pchlde was extracted using 1 ml of 80% acetone  
257 (v/v). In a black plastic 96-well plate (Grenier Bio-One), 200 µl of sample was loaded, with 3 biological replicates per  
258 genotype. The fluorescence of the samples was measured (excitation 440 nm/emission at 638 nm) with a Varioskan  
259 LUX spectrophotometer.

260

#### 261 Singlet oxygen measurements

262 Singlet oxygen was measured as previously described (Alamdari et al. 2020). Briefly, seedlings were grown  
263 on plates in 6 h light / 18 h dark diurnal cycling light conditions. As day three concluded, seedlings were moved to  
264 1.5 ml microcentrifuge tubes containing 250 µl of ½-strength Linsmaier liquid media, wrapped in foil, and incubated  
265 at 22°C for 18 h in the dark. An hour prior to subjective dawn on day four, 50 µM of 1.5 mM Singlet Oxygen Sensor  
266 Green (SOSG, Molecular Probes) and 0.1% Tween 20 (v/v) was added to the medium under dim, green light (final  
267 concentration of 250 µM). Seedlings were vacuum infiltrated for 30 min in the dark. After 30 additional min, seedlings  
268 were exposed to light for 3 h. Seedlings were washed once with 1 ml of ½-strength Linsmaier and Skoog medium pH

Tano, D. W. *et al.*, 2022

269 5.7 prior to imaging with a Zeiss Axiozoom 16 fluorescent stereo microscope equipped with a Hamamatsu Flash 4.0  
270 camera and a GFP fluorescence filter. At least 12 seedlings from each genotype were monitored and average  
271 fluorescence per mm<sup>2</sup> was quantified using ImageJ, choosing the brightest cotyledon per seedling.

272

#### 273 Assessment of cell death

274 Cell death was measured in plant tissue as previously described (Woodson et al. 2015). Briefly, tissue was  
275 stained with a trypan blue solution (10 ml phenol, 10 ml glycerol, 10 ml lactic acid, 10 ml H<sub>2</sub>O, and 0.02 mg trypan  
276 blue (Sigma)) diluted with 2 volumes of 100% ethanol. The tissue in the staining solution was boiled for 2 min at  
277 100°C and incubated at room temperature overnight. Non-specific stain was removed using 2 overnight chloral hydrate  
278 (25 g / 10 mL water) incubations. Tissue was moved to 30% glycerol for imaging. The intensity of the trypan blue  
279 stain was measured with ImageJ using at least 6 seedlings from each genotype and was normalized to the area of the  
280 cotyledon and then wt. The darkest cotyledon per seedling was chosen for measurements.

281

#### 282 Lesion Counting

283 To assess leaf lesion formation in adult plants, plants were grown under 16 h light / 8 h dark diurnal cycling  
284 light conditions until lesions became apparent in some plants (day 18). Lesions were counted for each plant for an  
285 additional 18 days.

286

### 287 **Results**

#### 288 Singlet oxygen accumulation in the *fc2*, *flu*, and *chl* backgrounds leads to overlapping nuclear transcriptomic 289 responses

290 The Arabidopsis *fc2* (Woodson et al. 2015), *flu* (op den Camp et al. 2003), and *chl* (Ramel et al. 2013)  
291 mutants produce excess <sup>1</sup>O<sub>2</sub> in the chloroplast, which leads to the induction of nuclear genes and cell death. However,  
292 we do not know if these three mutants utilize the same <sup>1</sup>O<sub>2</sub> signaling pathways to promote these outcomes. To test if  
293 these mutants share <sup>1</sup>O<sub>2</sub> pathways, we assessed the similarity of the nuclear responses to chloroplast <sup>1</sup>O<sub>2</sub> accumulation.  
294 We mined publicly available gene expression datasets to identify targets of the <sup>1</sup>O<sub>2</sub> signal in each genetic background  
295 (i.e., differentially expressed genes (DEGs)). For the *fc2* dataset, four-day-old etiolated (dark-grown) seedlings were  
296 exposed to light for 2 h (Woodson et al. 2015). The *flu* dataset was generated using plants grown to the rosette life

Tano, D. W. *et al.*, 2022

297 stage, incubated in the dark for 8 h, and then collected 1 h post light re-exposure (op den Camp et al. 2003). Finally,  
298 the *chl* dataset was from plants grown for 5-8 weeks and exposed to 8 h of EL for 2 days (Ramel et al. 2013). We also  
299 analyzed datasets from  $\beta$ -cc-treated wt plants. These plants were grown for 4 weeks and exposed to  $\beta$ -cc for 4 h before  
300 sample collection (Ramel et al. 2012). Finally, we compared the list of ESORGs identified in *flu* seedlings grown for  
301 5 days under constant light, dark incubated for 4 h, and re-exposed to light for 30 or 60 min before sample collection  
302 (Dogra et al. 2017). Unfortunately, there is not a publically available transcriptome dataset for the *acd2* mutant.  
303 Additional information on the datasets is listed in Table S16.

304 Next, we filtered the datasets to identify DEGs using cutoffs of  $\geq 2$ -fold difference and a p-value  $\leq 0.05$   
305 (Tables S6-10). Finally, we compared these lists of genes for each background/treatment group to identify DEGs  
306 shared between groups (Tables S11-15). A comparison of the identified 1,633 DEGs showed for each mutant, the  
307 majority of upregulated and downregulated DEGs were unique (Figs. 1A and B, Table S17). At the same time, a subset  
308 of DEGs were shared between the mutants (between 28.8-40.9% of total DEGs from one mutant overlapped with  
309 another). While the overlap appeared similar between the three mutants (8.5–31.0% DEGs within a set), the overlap  
310 between the *flu* and *chl* DEGs was slightly larger (31.0% of *flu* DEGs and 23.1% of *chl* DEGs) than with *fc2* (13.8%  
311 and 8.5% of *flu* and *chl* DEGs, respectively). In general, we observed more overlap between up-regulated DEGs than  
312 down-regulated DEGs among the three genetic backgrounds.

313 Furthermore, we compared these DEGs to those identified in  $\beta$ -cc-treated wt plants (Fig S1A, B and Table  
314 S18). While we observed overlap with each mutant (8.0-18.7%), the largest overlap was observed between  $\beta$ -cc-  
315 treated wt plants and EL treated *chl* mutants (18.7%). ESORGs identified in *flu* seedlings also showed a degree of  
316 overlap with each mutant (4.8-11.7%), but the largest overlap was observed with adult *flu* mutants (11.7%) (Fig. S1C  
317 and Table S19). Together, these results suggest that a core transcriptional response to chloroplast  $^1\text{O}_2$  occurs regardless  
318 of stress type, life stage, or stress duration.

319 To uncover roles of the overlapping gene expression, we conducted Gene Ontology (GO) term enrichment  
320 analyses. For genes upregulated in at least two genetic backgrounds (*fc2*, *flu*, or *chl*), we found a diverse array of GO  
321 terms (Fig. S2A). However, the majority clustered around “response to stress,” “regulation of cellular processes,” and  
322 “aromatic compound biosynthetic process.” For genes down-regulated in two or more genetic backgrounds (Fig. S2B),  
323 we identified fewer GO terms and they had lower significance scores. Nonetheless, we observed four terms associated  
324 with photosynthesis: “pigment metabolic process,” porphyrin-containing compound metabolic process,” “tetrapyrrole

Tano, D. W. *et al.*, 2022

325 metabolic process,” and “photosynthesis, light harvesting in photosystem I.” Our result is consistent with earlier  
326 studies indicating  $^1\text{O}_2$  signals reduce the expression of photosynthesis protein-encoding genes to minimize photo-  
327 oxidative damage in the light (Page et al. 2017).

328 Continuing our GO term enrichment analysis, we tested the DEGs in common with  $\beta$ -cc-treated wt and at  
329 least one other genetic background (*fc2*, *flu*, or *chl*). For up-regulated genes, we observed an enrichment for many  
330 GO terms found in common between the genetic backgrounds (Fig. S3A), with one large cluster around “response to  
331 chemical.” Some small differences include GO terms related to “sulfur compound metabolic process” and “plant organ  
332 senescence.” Despite these differences, the overall similarity suggests  $\beta$ -cc induces a similar response to the genetic  
333 backgrounds under photo-oxidative stress, further implicating this secondary metabolite in photo-oxidative stress  
334 signaling. As before, we found fewer GO terms with less significance with the down-regulated genes, yet we identified  
335 three terms associated with cell wall modifications (Fig. S3B). These results indicate plants may change their cell  
336 walls during  $^1\text{O}_2$  stress.

337 Finally, we performed a GO term enrichment analysis of ESORGs (Dogra et al. 2017) up-regulated in at least  
338 one genetic background (Fig. S4). We observed a striking similarity with GO terms identified through comparing  
339 mutants (Fig. S2A), having clusters around “response to stress,” “regulation of response to stress,” and “aromatic  
340 compound biosynthetic process.” We partly expected this result as Dogra et al. (2017) identified these ESORGs from  
341 *flu* seedlings. However, we also observed an enrichment for the GO terms “cellular response to hypoxia” and “cellular  
342 ketone metabolic process,” the latter suggesting a role for secondary metabolite synthesis or signaling.

343 Overall, the similarity between the GO term analyses of up-regulated genes within the datasets suggest plants  
344 have a core transcriptional response to  $^1\text{O}_2$  stress to induce the expression of genes broadly involved with stress,  
345 signaling, and secondary metabolites. However, our analysis shows a large number of unique DEGs attributed to each  
346 mutant and condition suggesting that plants use different pathways depending on the specific source and site of  
347 chloroplast  $^1\text{O}_2$  stress. To delve deeper into the uniqueness of each genotype’s response to chloroplast stress, we  
348 identified the top 28 significant GO terms associated with DEGs unique to each background totaling 61 different GO  
349 terms (Table S20). We did not include down-regulated genes in this analysis as the *flu* dataset contained 41 genes, too  
350 few for a robust enrichment analysis. Each mutant had GO terms unique to itself (64%, 50%, and 43% of the GO  
351 terms for *fc2*, *flu*, and *chl*, respectively). For the *fc2* mutant, GO terms involving heat and hypoxia were unique  
352 including “response to heat” “response to hypoxia” and “response to decreased oxygen levels.” For the *flu* mutant,

Tano, D. W. *et al.*, 2022

353 GO terms involving defense were unique including “response to bacterium,” “defense response to bacterium,” and  
354 “regulation of defense response.” The *chl* mutant had the fewest unique GO terms, but they included “response to  
355 hormone,” “response to abscisic acid,” and “response to jasmonic acid.” Despite these differences, we found a 28%  
356 overlap of the GO terms present in at least two mutants and a 10% overlap among all three mutants (notable GO terms  
357 include “response to stimulus,” “response to stress,” and “response to chemical.”) These results illustrate these mutant  
358 backgrounds activate similar responses (as indicated by shared and related GO terms), but utilize unique gene sets for  
359 tailored responses.

360

### 361 Testing genetic interactions with the *fc2* signaling pathway in seedlings

362 Because the *fc2*, *flu*, and *chl* <sup>1</sup>O<sub>2</sub>-producing backgrounds all conditionally trigger to cell death and have  
363 overlapping nuclear responses (Fig. 1), we tested if they employ the same mechanisms to transmit chloroplast stress  
364 signals. Therefore, we tested if genetic suppressors identified for one <sup>1</sup>O<sub>2</sub>-producing mutant would suppress the others.  
365 First, we introduced the *ppr30*, *cry1*, *oxi1*, *pub4*, *ex1*, and *ex2* mutant alleles into the *fc2* background. We previously  
366 demonstrated that *ex1* alone could not suppress cell death or nuclear signaling in the *fc2* mutant ((Woodson et al.  
367 2015) and repeated those results here (Fig. S5A-C)). Because EX1 and EX2 may have partially redundant functions  
368 (Page et al. 2017), we also introduced two alleles of *ex2* (*Salk\_021694/ex2-2* and *Salk\_121009/ex2-3* with T-DNA  
369 insertions in the eighth exon and tenth intron, respectively) (Fig. S6A). Researchers previously showed *ex2-2* is a null  
370 allele (Uberegui et al. 2015), and our analysis confirmed this conclusion. A semi-quantitative analysis of *EX2*  
371 transcripts showed *ex2-2* is likely a null allele due to the inability to detect full-length transcript (Fig. S6B). On the  
372 other hand, *ex2-3* produced normal length transcripts and a sequencing analysis of the amplified *ex2-3* cDNA revealed  
373 normal splicing across the tenth intron. Furthermore, a RT-qPCR analysis showed wt levels of *EX2* transcript in the  
374 *ex2-3* mutant (Fig. S6C). As such, we continued our analysis with the *ex2-2* null allele.

375 When grown under constant 24 h light, *fc2* mutant seedlings appear pale, but healthy (Fig. 2A). However,  
376 when they grow under 6 h light / 18 h dark diurnal cycling light conditions, the seedlings bleach and die, whereas wt  
377 is unaffected. As expected, the *ppr30-1* and *pub4-6* mutations suppress the bleaching phenotype and keep the seedlings  
378 green and alive. However, we did not observe any suppression of bleaching by *cry1-304*, *oxi1*, or the *ex1 ex2-2* allele  
379 combination. To confirm these phenotypes, we stained the seedlings with trypan blue to assess cell death in cotyledons.  
380 As expected, *fc2* mutants stained dark blue after growing under 6 h light / 18 h dark diurnal cycling light conditions,

Tano, D. W. *et al.*, 2022

381 confirming cell death (Fig. 2B and C). As expected from the visual phenotypes, *ppr30-1* and *pub4-6* significantly  
382 reduced cell death in *fc2*, while *cry1-304* and *oxi1* did not. Surprisingly, the *fc2 ex1 ex2-2* mutant did not suffer  
383 significant levels of cell death despite having a bleached appearance.

384 Next, we tested if these mutations affect retrograde signaling to the nucleus and alter the transcriptional  
385 response. We measured steady state transcript levels in four-day-old seedlings grown under 6 h light / 18 h dark diurnal  
386 cycling light conditions one hour post subjective dawn using RT-qPCR, probing for six previously identified  
387 chloroplast stress marker genes (*SIB1* and *HSP26.5* identified in <sup>1</sup>O<sub>2</sub>-stressed *fc2* seedlings (Woodson et al. 2015),  
388 *BAP1* and *ATPase* identified in <sup>1</sup>O<sub>2</sub>-stressed *flu* seedlings (op den Camp et al. 2003), and general oxidative stress  
389 markers *ZAT12* and *GST* (Baruah et al. 2009)). As shown in Fig. 2D, photo-oxidative stress significantly induces  
390 expression of five of the six stress marker genes (excluding the *flu* marker *BAP1*) in *fc2* compared to wt. As expected  
391 of suppressors, both *ppr30-1* and *pub4-6* reduce induction of these marker genes. In line with their bleached  
392 phenotypes, *cry1-304* and *oxi1* did not hugely impact of expression of the marker genes. Compared to wt, *fc2 cry1-*  
393 *304* and *fc2 oxi1* experienced significant induction of all marker genes (except for *ZAT12* in *fc2 cry1-304*). Despite its  
394 pale appearance, the *fc2 ex1 ex2-2* mutant transcriptionally resembled the suppressors (*fc2 ppr30-1* and *fc2 pub4-6*)  
395 with no significant induction of stress marker genes compared to wt. Together, these results suggest neither CRY1  
396 nor OXI1 play a major role in <sup>1</sup>O<sub>2</sub>-triggered cell death or retrograde signaling in *fc2* mutant seedlings. However, the  
397 results reveal a potential genetic interaction between *fc2* and the *ex1 ex2-2* combination.

398 We did not expect the *ex1 ex2-2* combination to suppress cell death and transcriptomic responses in *fc2* as  
399 *ex1* does not partially suppress these *fc2* phenotypes alone ((Woodson et al. 2015) and Fig. S5A-C). To distinguish if  
400 *ex1* and *ex2-2* additively suppress cell death or if *ex2-2* alone is sufficient, we generated an *fc2 ex2-2* mutant. Under  
401 6 h light / 18 h dark diurnal cycling light conditions, the *fc2 ex2-2* mutant was visually similar to the *fc2* mutant (Fig.  
402 S5A). Furthermore, trypan blue stains confirmed the *ex2-2* mutation alone did not suppress cell death in the *fc2*  
403 background (Figs. S5B and C).

404 One possible mechanism to suppress cell death in *fc2* is through reducing tetrapyrrole biosynthesis (either  
405 directly or by reducing general chloroplast development). Second site mutations can accomplish this reduction by  
406 decreasing flux through the tetrapyrrole pathway and avoiding <sup>1</sup>O<sub>2</sub> accumulation (e.g. plastid protein import and  
407 tetrapyrrole biosynthesis mutants) (Woodson et al. 2015). Indeed, the *fc2 ex1 ex2-2* mutant appeared very pale even  
408 under permissive 24 h constant light conditions (Fig. 2A). As expected, these mutant seedlings had significantly



Tano, D. W. *et al.*, 2022

409 reduced levels of total chlorophyll compared to *fc2* (Fig. 2E). *ex1* and *ex2-2* had an additive effect in terms of  
410 chlorophyll reduction (the triple mutant contained less total chlorophyll than either *fc2 ex* double mutant) independent  
411 of the *fc2* background (*ex1 ex2-2* accumulated less total chlorophyll than wt). To determine if light-induced  
412 degradation or decreased tetrapyrrole synthesis caused a reduction in chlorophyll levels, we measured steady-state  
413 protochlorophyllide (Pchl<sub>id</sub>) levels in etiolated (dark grown) seedling to gauge the flux through the tetrapyrrole  
414 pathway. As previously shown, *fc2* mutants accumulate two-to-three-fold excess Pchl<sub>id</sub> compared to wt ((Woodson  
415 et al. 2015) and Fig. 2F). The *fc2 ex1 ex2-2* mutant had wt Pchl<sub>id</sub> levels suggesting the mutant had reduced  
416 tetrapyrrole synthesis. Next, we measured bulk <sup>1</sup>O<sub>2</sub> levels in four-day-old seedlings grown under 6 h light / 18 h dark  
417 diurnal cycling light conditions using Singlet Oxygen Sensor Green (SOSG) (Fig. 2G and H). Two hours after  
418 subjective dawn, *fc2* mutants accumulated excess <sup>1</sup>O<sub>2</sub> compared to wt. However, the *fc2 ex1 ex2-2* mutant had wt <sup>1</sup>O<sub>2</sub>  
419 levels. Together, these results suggest the *ex1* and *ex2-2* mutations additively block *fc2* phenotypes by reducing  
420 tetrapyrrole synthesis and <sup>1</sup>O<sub>2</sub> production rather than by directly affecting a signaling mechanism as shown in the *flu*  
421 mutant.

422

#### 423 Testing genetic interactions with the *fc2* signaling pathway in adult plants

424 As life stage could affect the ability of these mutations to suppress the *fc2* cell death phenotype, we tested  
425 for suppression of cell death in adult plants. We grew plants for 21 days under 24 h constant light conditions and  
426 shifted them to 16 h light / 8 h dark diurnal cycling light conditions for 6 days. As a control, we kept another set of  
427 plants in 24 h constant light for the full 27 days. Under constant 24 h light, *fc2* plants appeared relatively healthy and  
428 do not present any indications of obvious cell death lesions (Fig. 3A). However, after shifting to 16 h light / 8 h dark  
429 diurnal cycling light conditions, *fc2* mutants developed leaf lesions. A trypan blue stain confirmed these lesions are  
430 areas of cell death (Figs. 3B and C). If a mutation causes suppression of <sup>1</sup>O<sub>2</sub> signaling in *fc2*, we expect a reduction  
431 in the appearance of leaf lesions under these conditions. We found, as expected, that the *ppr30* and *pub4-6* mutations  
432 suppressed the *fc2* cell death phenotype, having fewer observable lesions and less trypan blue staining than the *fc2*  
433 single mutant (Figs. 3A-C). Surprisingly, we found the *oxi1* mutation significantly suppressed lesion formation in the  
434 *fc2* mutant, suggesting OXII may play a role in <sup>1</sup>O<sub>2</sub> signaling in *fc2* adult plants. The *ex1 ex2-2* combination did not  
435 suppress cell death in adult leaves, consistent with these mutations leading to developmental (rather than signaling)

Tano, D. W. *et al.*, 2022

436 defects. As in seedlings, *cry1-304* did not suppress cell death, further suggesting CRY1 does not play a strong role in  
437  $^1\text{O}_2$  signaling in the *fc2* mutant.

438

439 Testing genetic interactions in *flu* mutant seedlings

440 To continue our assessment of potential genetic interactions of known chloroplast  $^1\text{O}_2$  suppressors in other  
441  $^1\text{O}_2$ -generating backgrounds, we monitored phenotypes of  $^1\text{O}_2$  signaling mutations in the *flu* mutant background.  
442 Previously, researchers determined *flu* mutants accumulate chloroplast  $^1\text{O}_2$  proportionally to increasing lengths of time  
443 in the dark (Wang et al. 2020). To experimentally determine the length of time in the dark needed to induce cell death,  
444 we treated five-day-old wt and *flu* seedlings to various lengths of time in the dark (0, 4, 8, 12, and 24 h) and re-exposed  
445 the seedlings to light for 36 h. Based on the outcomes shown in Fig. S7A, we decided 12 h of dark was adequate to  
446 completely bleach most *flu* seedlings within 36 h of light exposure. Therefore, we crossed in  $^1\text{O}_2$  signaling mutations  
447 (*ex1*, *pub4-6*, *cry1-304*, and *oxi1*) into the *flu* background to test which mutations may block  $^1\text{O}_2$  signaling phenotypes.

448 As expected, the *ex1* mutation suppressed bleaching in the *flu* seedlings after a 12 h dark treatment (Fig. 4A),  
449 while the other mutations did not obviously appear to affect bleaching. To confirm our visual assessment, we  
450 performed a trypan blue stain using the 12 h time point to confirm *flu* mutants experience extensive cell death in their  
451 cotyledons, and the *ex1* mutation significantly reduces this effect to near wt levels (Figs. 4B and C). As expected from  
452 their bleached phenotypes, *flu pub4-6* and *flu oxi* stained similarly to *flu*. However, we found *flu cry1-304* stained  
453 significantly lower than *flu* (p value  $\leq 0.001$ ), confirming CRY1 plays at least a minor role in  $^1\text{O}_2$  signaling in *flu*  
454 mutants (Danon et al. 2006).

455 Next, we tested if our double mutants activated  $^1\text{O}_2$ -triggered retrograde signaling by measuring the  
456 expression of stress marker genes (as for *fc2* (Fig. 2D)). Here, we also included *NOD1*, another gene induced in *flu*  
457 mutants (op den Camp et al. 2003). We placed five-day-old seedlings in the dark for 12 h and exposed them to 1 h  
458 light prior to tissue collection for RNA extraction. In the *flu* mutant, we observed significant induction of all three *flu*-  
459 specific stress marker gene transcripts (Figs. 4D). Expectedly, we observed that *ex1* reduced expression of these genes  
460 (Lee et al. 2007). *pub4-6* and *cry1-304* did not significantly reduce any one of these transcripts. However, *oxi1* lowered  
461 levels of two transcripts (*ATPase* and *NOD1*). We tested the other four stress marker transcript levels in the *flu* mutant.  
462 We observed higher transcript levels compared to wt, but they were not significant (Fig. S7B). Furthermore, none of  
463 the suppressor mutations significantly reduced expression of these marker genes. Together, these results suggest PUB4

Tano, D. W. *et al.*, 2022

464 does not play a significant role in facilitating the  $^1\text{O}_2$  signal in *flu* mutants, while CRY1 plays a minor role in regulating  
465 cell death in *flu* seedlings. OXI1 does not play a major role in triggering cell death in the *flu* mutant, yet it may play a  
466 minor role in transmitting the retrograde signal to the nucleus.

467

#### 468 Testing genetic interactions in *flu* adult plants

469 As with the *fc2* mutant, we assessed if life stage affected  $^1\text{O}_2$ -signaling in the *flu* mutant. We grew wt, *flu*,  
470 and the double mutant plants under 24 h constant light conditions to avoid  $^1\text{O}_2$  stress. We then shifted them to 16 h  
471 light / 8 h dark diurnal cycling light conditions for 3 days to accumulate Pchl $a$  and  $^1\text{O}_2$ . As expected, the *flu* plants  
472 developed lesions under these conditions, whereas wt appeared normal (Fig. 5A). *flu ex1* plants exposed to 16 h light  
473 / 8 h dark diurnal cycling light conditions for 5 days did not develop leaf lesions, consistent with EX1 playing a role  
474 in  $^1\text{O}_2$ -triggered cell death regardless of life stage (Wagner et al. 2004) (Fig. 5A). As in seedlings, we did not observe  
475 obvious suppression of the cell death phenotype by *cry1-304*, *pub4-6*, or *oxi1* in adult plants. We confirmed these cell  
476 death phenotypes with a trypan blue cell death stain (Figs. 5B and C). Together, we conclude  $^1\text{O}_2$  signaling in the *flu*  
477 mutant utilizes the *EX1*-dependent pathway rather than the PUB4 (and possibly OXI1)-dependent chloroplast quality  
478 control pathway implemented by *fc2*. However, OXI1 may contribute to the retrograde signaling in seedlings to control  
479 some nuclear gene expression in the *flu* mutant.

480

#### 481 Testing genetic interactions with the *chlorinal* signaling pathway

482 Previously, researchers demonstrated that growing the *chl* mutant under EL stress ( $\geq 1,100 \mu\text{mol photons m}^{-2}$   
483  $\text{sec}^{-1}$ ) induces  $^1\text{O}_2$  signaling (Ramel et al. 2013). The generated  $^1\text{O}_2$  initiates cell death, which the *oxi1* mutation  
484 blocks in adult plants (Shumbe et al. 2016). Furthermore, researchers demonstrated EX1 and EX2 are not involved in  
485 *chl*'s  $^1\text{O}_2$  signaling since *chl ex1 ex2* mutants suffer from a comparable level of EL-triggered cell death to *chl* (Ramel  
486 et al. 2013). Here, we tested the involvement of PUB4 in transmitting this  $^1\text{O}_2$  signal. We grew seedlings under  
487 permissive light conditions ( $120 \mu\text{mol photons m}^{-2} \text{sec}^{-1}$ ) for 7 days and shifted them to  $1,200 \mu\text{mol photons m}^{-2} \text{sec}^{-1}$   
488 for 24 h. We lowered the ambient temperature to  $10^\circ\text{C}$  to avoid any incidental heat stress caused by the increased  
489 radiation. Within 2 h, all seedlings experienced a decrease in maximum photosystem II quantum efficiency ( $F_v/F_m$ ),  
490 which continued to decrease for 24 h of treatment (Fig. 6A). Furthermore, we observed photo-bleaching of cotyledons  
491 after 12 h of EL. Photo-bleaching worsened after 24 h (Fig. 6B). At the same time points, we observed increased

Tano, D. W. *et al.*, 2022

492 susceptibility (lowered  $F_v/F_m$  values and increased bleaching) of the *chl* mutant to EL stress, consistent with its  
493 chloroplasts experiencing increased photo-damage (Ramel et al. 2013). The *pub4-6* mutation partially reversed these  
494 effects (increased  $F_v/F_m$  values at 2 and 6 h EL and delayed bleaching at 12 h EL), while the *oxi1* mutation did not  
495 reverse them. Additionally, we observed increased tolerance of the *pub4-6* single mutant to EL compared to wt, having  
496 higher  $F_v/F_m$  values at 2 and 6 h EL and delayed bleaching at 12 h EL (Figs. 6A and B). Together, these results suggest  
497 PUB4 may be involved in EL-triggered  $^1O_2$  signaling in the seedling stage.

498         As researchers previously studied the *chl* EL-treated phenotype in adult plants and leaves (Ramel et al. 2013;  
499 Shumbe et al. 2016), we tested EL sensitivity in 18-day-old plants. We grew plants under permissive light conditions  
500 ( $70 \mu\text{mol photons m}^{-2} \text{sec}^{-1}$ ) for 18 days. Next, we shifted them to  $1,300 \mu\text{mol photons m}^{-2} \text{sec}^{-1}$  at  $10^\circ\text{C}$ . Similar to  
501 seedlings, all plants experienced an immediate decrease in  $F_v/F_m$  values indicating photo-damage (Fig. S8A). Again,  
502 the *chl* mutant was particularly susceptible. *oxi1* and *pub4-6* did not significantly affect  $F_v/F_m$  values in the *chl*  
503 background (although *pub4-6* single mutants had significantly higher  $F_v/F_m$  values compare to wt at 6 and 12 h EL).  
504 However, *oxi1* and *pub4-6* attenuated photo-bleaching in both wt and *chl* backgrounds (Figs. 6C and S8B). Together,  
505 our results suggest both OX11 and PUB4 play a role in transmitting EL-triggered stress signals, but OX11 may play a  
506 stage-specific role in adult leaves.

507

508 Onset of lesions in the *acd2* mutant was slowed by *pub4-6*

509         As *pub4-6* mitigated  $^1O_2$ -induced cell death in the *fc2* and *chl* mutants, we investigated if it can affect lesion  
510 formation caused by other sources of ROS. Therefore, we examined the effect of the *pub4-6* mutation in the ROS and  
511 lesion accumulating *acd2* mutant. Prior work determined that a *cry1* mutation or a *ex1 ex2* combination did not  
512 significantly alter the accumulation of lesions, suggesting the *flu* signaling pathway is not being used in *acd2* to induce  
513 cell death (Pattanayak et al. 2012). As PUB4 appears to represent another separate  $^1O_2$  pathway, we tested if PUB4  
514 plays a role in lesion formation in *acd2* mutants by generating *acd2 pub4-6* double mutants and growing them  
515 alongside wt and the corresponding single mutants under 16 h light / 8 h dark diurnal light cycling conditions. Initially,  
516 *acd2* mutant plants appeared healthy and comparable to wt. However, after 18 days, *acd2* mutants began to randomly  
517 develop lesions of cell death on their leaves, which accumulated until senescence (Figs. 7A and B and S9). Conversely,  
518 we observed the *acd2 pub4-6* double mutant appeared healthier than the *acd2* single mutant, and developed fewer  
519 leaves with lesions over time. At 36 days, we stopped the experiment as we could not reliably distinguish between

Tano, D. W. *et al.*, 2022

520 *acd2*-specific and normal leaf senescence lesions. This early senescence was particularly apparent in *pub4-6* as  
521 previously reported (Woodson et al. 2015). Together, these data suggest PUB4 is involved in regulating ROS-induced  
522 lesion formation in *acd2* plants.

523

## 524 **Discussion**

525 Despite knowing chloroplast  $^1\text{O}_2$  has signaling capabilities, natural stresses complicate its study by causing  
526 complex ROS signatures in plant cells (Choudhury et al. 2017; Rosenwasser et al. 2013). Thus, to dissect  $^1\text{O}_2$  signals,  
527 researchers use several Arabidopsis mutants that conditionally and specifically produce this ROS, including *fc2*  
528 (Woodson et al. 2015), *flu* (Meskauskiene et al. 2001), *ch1* (Ramel et al. 2013), and *acd2* (Pruzinská et al. 2007). To  
529 assess how similar these signaling pathways are, we compared publicly available transcriptomic data for the *fc2*, *flu*,  
530 and *ch1* mutants (the *acd2* mutant did not have an available dataset for comparison). We found each mutant shared a  
531 proportion of their DEGs with the other two mutants (Fig. 1). We were surprised by this overlap since the datasets  
532 represent samples collected from different ages (seedling vs. adult) and grown in different conditions to elicit  $^1\text{O}_2$   
533 stress in the chloroplasts. Therefore, we hypothesize these genotypes share a core transcriptomic response and that the  
534 different sources of  $^1\text{O}_2$  converge on some transcriptomic responses. To further support our hypothesis, we found  $\beta$ -  
535 cc responsive genes and ESORGs in the mutant datasets (Figs. S1A-C). Notably, as we found  $\beta$ -cc responsive genes  
536 in the *fc2* and *flu* datasets, we can hypothesize these mutants produce  $\beta$ -cc. To the best of our knowledge, however,  
537 researchers have not reported such measurements.

538 Notwithstanding the similarities found in the transcriptomic meta-analysis, we identified DEGs specific to  
539 each background (Fig. 1A). Although these DEGs were unique, we found they produced similar GO-terms between  
540 mutants for up-regulated genes (Table S20). These GO terms include “response to stimulus,” “response to stress,” and  
541 “response to chemical.” These results may indicate these mutants employ different sets of genes with similar functions  
542 for the cell to respond or acclimate appropriately to a specific stress. We hypothesize such ROS signatures may mimic  
543 those caused by different types of environmental stress as each of these mutants produce  $^1\text{O}_2$  differently (Rosenwasser  
544 et al. 2013).

545 Our meta-analysis revealed the potential for the existence of multiple  $^1\text{O}_2$  signaling pathways in these  
546 mutants. Therefore, we took a genetic approach to identify potential converging points of these pathways. We  
547 hypothesized that if a secondary suppressor mutation for one mutant background has a genetic interaction within a

Tano, D. W. *et al.*, 2022

548 different mutant background, these two mutant backgrounds may share a portion of their signaling cascades. First,  
549 with *fc2* mutant seedlings, we observed the *ppr30-1* and *pub4-6* mutations suppressed cell death and retrograde  
550 signaling as previously described (Alamdari et al. 2020; Woodson et al. 2015). Initially, we did not notice obvious  
551 suppression of the *fc2* cell death phenotype by suppressors of the *flu* or *chl* backgrounds (Fig. 2A). Nonetheless, with  
552 further analysis, we found *fc2 ex1 ex2-2* seedlings had blocked cell death and retrograde signaling even though they  
553 were bleached white under permissible growing conditions (Figs. 2A-C).

554         These results surprised us as we previously demonstrated *ex1* alone does not block  $^1\text{O}_2$  controlled retrograde  
555 signaling or cell death in *fc2* seedlings or adults (Woodson et al. 2015). Indeed, both the *fc2 ex1* and *fc2 ex2-2* double  
556 mutants had similar levels of cell death to *fc2*, suggesting the suppression in the triple mutant was additive (Figs. S5A-  
557 C). We hypothesize the mechanism of suppression is indirect, as the *fc2 ex1 ex2-2* accumulated less bulk  $^1\text{O}_2$  compared  
558 to *fc2* (Figs. 2G and H). The observed suppression is likely due to a delay in chloroplast development and a decrease  
559 in tetrapyrrole synthesis: *ex1 ex2-2* led to a decrease in chlorophyll and Pchl<sub>ide</sub> levels (Figs. 2E and F). Furthermore,  
560 the *ex1 ex2-2* combination failed to block cell death in adult *fc2* mutants, which suggests that once chloroplasts become  
561 fully developed, the *ex1 ex2-2* combination does not affect the *fc2* phenotype. How the *ex1 ex2* combination affects  
562 chloroplast development is not clear as these proteins are primarily implicated in ROS signaling. Adding to the  
563 complexity, recent work suggests these two proteins have different functions. EX2 may act as a decoy to protect EX1  
564 from oxidation and prevent premature signaling (Dogra et al. 2022). Thus, a double mutant may have a more  
565 complicated phenotype than previously assumed. Even so, we conclude the EX proteins do not play a direct role in  
566  $^1\text{O}_2$  signaling in the *fc2* mutant.

567         To our surprise, the *oxi1* mutation suppressed the cell death phenotype in *fc2* adult plants (similarly to the  
568 *ppr30-1* and *pub4-6* mutations) even though it did not affect cell death or retrograde signaling in seedlings. To date,  
569 researchers have primarily studied the role of OXI1 in  $^1\text{O}_2$  signaling in adult plants and leaves (Shumbe et al. 2016).  
570 However, some research indicates OXI1 plays a role in basal defense against oomycete pathogens in seven-day-old  
571 seedling cotyledons (Rentel et al. 2004) indicating that OXI1 is present in this tissue. This may mean that OXI1 only  
572 participates in chloroplast  $^1\text{O}_2$  signaling in true leaf mesophyll cells, which is consistent with our EL experiments  
573 where the *oxi1* mutation only mitigated cell death in adult leaves (Figs. 6A-C). Prior work indicates chloroplast  
574 physiology differs between the embryonic cotyledons in seedlings and the mesophyll cells in true leaves (Albrecht et

Tano, D. W. *et al.*, 2022

575 al. 2008). Whether a different serine/threonine kinase is used in cotyledons, or there is another mechanism altogether,  
576 will require further study.

577 Next, we performed similar experiments in the *flu* mutant. In seedlings, we observed suppression of cell death  
578 by the *ex1* and *cry1-304* mutations, and *ex1* reduced expression of all three nuclear marker genes (Figs. 4A-D). Neither  
579 *pub4-6* or *oxi1* reduced cell death, although *oxi1* did have a minor effect on retrograde signaling. While EX1 is  
580 necessary for  $^1\text{O}_2$  signaling in *flu* mutants (Dogra et al. 2019), researchers have previously demonstrated CRY1's  
581 involvement only in protoplasts (Danon et al. 2006). In protoplasts, the effect of the *cry1* mutation was equally strong  
582 compared to *ex1* in terms of cell death. In our study, the effect of the *cry1* mutation was noticeably weaker than *ex1*  
583 in seedlings, and *cry1* did not significantly suppress cell death in the adult phase (Figs. 5B and C). These results may  
584 be due to a difference between systems (*in vitro* protoplasts vs *in planta*). The protoplast study also used the *Landsberg*  
585 *erecta* ecotype with different *flu* and *cry1* alleles (this study was performed in the *Columbia* background), which may  
586 also account for some of the differences. When researchers performed a microarray analysis of  $^1\text{O}_2$ -responsive  
587 transcripts in *flu* protoplasts, they found the *cry1* mutation affected only ~3% of the DEGs in *flu* (Danon et al. 2006).  
588 When we pair this finding with our work here, we hypothesize CRY1 plays a minor role in the  $^1\text{O}_2$  retrograde signal,  
589 which can be uncoupled from cellular degradation. Overall, however, our results suggest the *flu* mutant emits a  
590 functionally unique signal that does not involve PUB4 or OXI1 to control cellular degradation.

591 To continue our investigation of  $^1\text{O}_2$  signaling, we next tested the *chl* mutant that produces  $^1\text{O}_2$  due to  
592 unprotected PSII reaction centers (Ramel et al. 2013) and signals for cell death with OXI1 (Shumbe et al. 2016).  
593 Previously, researchers showed cellular degradation in this background is independent of EX1 and EX2; *chl ex1 ex2*  
594 mutants still suffer EL-induced lesions and PSII photo-inhibition (Ramel et al. 2013). Accordingly, we assessed if the  
595 *fc2* pathway is active in *chl* mutants by testing the role of PUB4 in EL stress. In EL-stressed seedlings, *pub4-6*  
596 attenuated cotyledon bleaching and the reduction in  $F_v/F_m$  values in the wt and *chl* backgrounds (Figs. 6A and B).  
597 Somewhat surprisingly, the *oxi1* mutation did not affect these phenotypes, further suggesting OXI1 is not involved in  
598  $^1\text{O}_2$  signaling in seedlings. In the adult phase, both *oxi1* and *pub4-6* attenuated EL-induced lesions in the wt and *chl*  
599 backgrounds (Fig. 6C), confirming earlier reports on OXI1 (Shumbe et al. 2016) and suggesting *fc2* and *chl* mutants  
600 share a  $^1\text{O}_2$  signaling pathway induced by natural EL stress.

601 Finally, as *pub4-6* can block  $^1\text{O}_2$ -induced cell death in *fc2* and *chl* mutants, we tested if we would observe a  
602 similar trend in the *acd2* mutant, which produces leaf lesions due to the accumulation of chlorophyll breakdown

Tano, D. W. *et al.*, 2022

603 products (such as RCC) that can produce  $^1\text{O}_2$  (Pruzinská *et al.* 2007). Remarkably, the *acd2 pub4-6* double mutant  
604 had delayed onset of lesions compared to the *acd2* single mutant, suggesting *acd2* mutants activate the same pathway  
605 as *fc2* and *chl* mutants (Figs. 7A and B). Previously, researchers demonstrated neither *cry1* or an *ex1 ex2* combination  
606 could reduce lesion formation in the *acd2* background (Pattanayak *et al.* 2012), further indicating the  $^1\text{O}_2$ -signaling  
607 pathway used by *flu* mutants is distinct. This result also led the authors to conclude chloroplast  $^1\text{O}_2$  and ROS were not  
608 responsible for cell death. As  $^1\text{O}_2$  can be detected in *acd2* mitochondria, these researchers hypothesized these  
609 organelles may trigger a signal instead. Nevertheless, the observation that *pub4-6* reduces lesion formation in *acd2*  
610 opens the possibility for the involvement of chloroplast  $^1\text{O}_2$  during lesion formation in *acd2* mutants. On the other  
611 hand, we cannot rule out the possibility that PUB4 plays a role in mitochondrial ROS signaling.

612 Overall, our work suggests chloroplasts use at least two  $^1\text{O}_2$  signaling pathways to control cellular  
613 degradation. One pathway depends on the PUB4 protein to control cellular degradation and is employed by *fc2*, *chl*,  
614 and *acd2* mutants along with EL-stressed wt plants. At least in *fc2* and *chl* mutants, the OXI1 protein participates in  
615 this pathway (its role in *acd2* was not tested), but is restricted to true leaves in adult tissue. *flu* mutants utilize an  
616 alternative  $^1\text{O}_2$  signaling pathway. Instead, their  $^1\text{O}_2$  signal requires EX1 and (at least in seedlings) CRY1 to initiate  
617 cell death. Retrograde signaling to the nucleus to alter the transcriptome follows a similar, yet more complex, pattern.  
618 For instance, the *cry1* and *oxi1* mutations partially reduce the expression of some stress marker genes in the *fc2* and  
619 *flu* backgrounds, respectively, despite no effect on cell death. As these effects on transcript levels were relatively mild,  
620 we hypothesize some crosstalk may exist between these two  $^1\text{O}_2$  pathways.

621 As the *fc2*, *flu*, and *chl* mutants produce  $^1\text{O}_2$  within chloroplasts that leads to retrograde signaling (to control  
622 similar sets of genes), cell death, and (at least in *flu* and *fc2*) chloroplast degradation, we were initially surprised  
623 multiple pathways can be activated by this specific ROS. One possibility we suggest that the exact location of  $^1\text{O}_2$   
624 production determines which signal is activated. In *flu* mutants, this likely occurs in the thylakoid grana margins where  
625 the EX proteins localize (Dogra *et al.* 2022; Wang *et al.* 2016). These grana margins are the site of PSII repair and  
626 tetrapyrrole synthesis, both potential sources of  $^1\text{O}_2$  in the light. On the other hand, *chl* mutants produce  $^1\text{O}_2$  within  
627 the grana core, the site of active PSII (Ramel *et al.* 2013). Researchers have not yet determined the exact site of  $^1\text{O}_2$   
628 production in *fc2* and *acd2* mutants. However, some work suggests Proto accumulates in the chloroplast envelope and  
629 stromal fractions of pea and beet, respectively (Mohapatra *et al.* 2002; Mohapatra *et al.* 2007). Thus,  $^1\text{O}_2$  in *fc2* may  
630 represent a more advanced stage of photo-oxidative stress where damage has spread throughout the chloroplast.



Tano, D. W. *et al.*, 2022

631 Another possibility for multiple pathways could be that the kinetics of  $^1\text{O}_2$  accumulation affects signaling.  $^1\text{O}_2$  is  
632 produced almost instantly after light exposure in *flu* mutants due to the accumulation of Pchl<sub>a</sub> in the dark  
633 (Meskauskiene et al. 2001). On the other hand,  $^1\text{O}_2$  production in the other mutants is slower and accumulates over  
634 time (Ramel et al. 2013; Woodson et al. 2015). The identification of additional signaling components should help  
635 resolve these possibilities.

636 Ultimately, we do not yet know why chloroplasts require multiple  $^1\text{O}_2$  signaling pathways to respond to stress  
637 or what the roles of these pathways are under natural environmental stresses. However, some experiments have offered  
638 clues. Under severe photo-inhibitory conditions that lead to bleaching and cell death, the *fc2/chl1* pathway may prevail.  
639 *pub4-6* (shown here) and *oxi1* (shown here and (Shumbe et al. 2016)) mitigate cell death under EL stress. We have  
640 demonstrated other suppressors of *fc2* cell death slow light-induced photo-bleaching in leaves (i.e., *ppr30*, *mterf9*  
641 (Alamdari et al. 2020) and cotyledons (i.e. *ctps2*) (Alamdari et al. 2021)). Under milder, non-photo-inhibitory light  
642 stress, plants may utilize the *flu* pathway. *ex1* blocks the formation of microlesions under moderate light stress that  
643 did not associate with non-enzymatic lipid peroxidation (Kim et al. 2012). Furthermore, these pathways could integrate  
644 different types of stress signals. Prior work links PUB4 and OXI1 to basal defense pathways (Rentel et al. 2004; Wang  
645 et al. 2022), and PUB4 plays a role in nitrogen and carbon starvation (Kikuchi et al. 2020). These findings suggest the  
646 *fc2/chl1* pathway might integrate with defense and senescence pathways. On the other hand, researchers have shown  
647 EX1 has a role in systemic acquired acclimation responses to EL stress (Carmody et al. 2016), suggesting plants use  
648 the *flu* pathway for distal signaling. These results along with our current findings demonstrate that chloroplast  $^1\text{O}_2$   
649 signaling is a complex process requiring additional investigation. However, the existence of two (or more) chloroplast  
650 pathways may allow plants to better respond to their surroundings and to thrive in stressful and dynamic environments.

651

#### 652 Funding

653 The authors acknowledge the Division of Chemical Sciences, Geosciences, and Biosciences, Office of Basic  
654 Energy Sciences of the U.S. Department of Energy grant DE-SC0019573 awarded to JDW. DWT was supported by  
655 the University of Arizona University Fellows Award, the John Boynton Fellowship (School of Plant Sciences), and  
656 the Graduate College Completion Fellowship. MAK was supported by the University of Arizona University Fellows  
657 Award.

658

Tano, D. W. *et al.*, 2022

659 Authors' contributions

660 DWT, MAK, and JDW planned and designed the research. DWT performed all genetic analyses, metabolite  
661 measurements, meta-data analyses, and physiological growth experiments. DWT and RAE performed all genotyping  
662 and gene expression experiments. MAK performed all EL growth experiments and photosynthetic measurements.  
663 DWT and JDW performed the SOSG assays. JDW conceived the original scope of the project and managed the project.  
664 DWT and JDW wrote the manuscript. All authors contributed to data analysis, collection, and interpretation.

665

666 Acknowledgments

667 The authors wish to thank Matthew Lemke (University of Arizona) for technical assistance with trypan blue  
668 staining, Emmanuel Gonzalez (University of Arizona) for technical assistance with genotyping, and Kamran Alamdari  
669 (University of Arizona) for technical assistance propagating mutant lines.

670

671 **Short legends for supporting information**

672 Supplemental Figures

673 Fig. S1. Meta-analysis of transcriptome expression data from three chloroplast <sup>1</sup>O<sub>2</sub>-producing mutant backgrounds.

674 Fig. S2. GO Term analysis for <sup>1</sup>O<sub>2</sub>-producing genetic backgrounds.

675 Fig. S3. GO Term analysis for transcriptome overlap between <sup>1</sup>O<sub>2</sub>-producing genetic backgrounds and β-cyclocitral  
676 treatment.

677 Fig. S4. GO Term analysis for transcriptome overlap between <sup>1</sup>O<sub>2</sub>-producing genetic backgrounds and ESORGs.

678 Fig. S5. Effects of *ex1* and *ex2* mutations on cell death in the *fc2* mutant background.

679 Fig. S6. *EX2* expression levels in *ex2* T-DNA mutants.

680 Fig. S7. Analysis of extended dark periods on retrograde signaling and the severity of cell death in *flu* mutant seedlings.

681 Fig. S8. Effect of singlet oxygen signaling mutations on EL-induced phenotypes.

682 Fig. S9. The *pub4-6* mutation slows the progression of spontaneous cell death in the *acd2* mutant

683

684 Supplementary Tables

685 Table S1. Mutant lines used in study

686 Table S2. Primes used for RT-qPCR and genotyping

Tano, D. W. *et al.*, 2022

- 687 Table S3. Nuclear-encoded genes included on the Affymetrix GeneChip Arabidopsis ATH1 Genome Array
- 688 Tables S4. Genes included on the CATv5 microarray (Complete Arabidopsis Transcriptome Microarray)
- 689 Table S5. Nuclear-encoded genes shared by the Affymetrix GeneChip Arabidopsis ATH1 and CATv5 Microarrays
- 690 Table S6. Differentially expressed genes in the *fc2* mutant dataset
- 691 Table S7. Differentially expressed genes in the *flu* mutant dataset
- 692 Table S8. Differentially expressed genes in the *chl* mutant dataset
- 693 Table S9. Differentially expressed genes in the  $\beta$ -cyclocitral treatment dataset
- 694 Table S10. Singlet Oxygen Early Response Genes (ESORGS)
- 695 Table S11. Up-regulated genes shared by the three singlet oxygen producing mutants
- 696 Table S12. Down-regulated genes shared by the three singlet oxygen producing mutants
- 697 Table S13. Up-regulated genes shared between mutants and  $\beta$ -cyclocitral treatment
- 698 Table S14. Down-regulated genes shared between mutants and  $\beta$ -cyclocitral treatment
- 699 Table S15. Up-regulated ESORGS shared between mutant backgrounds
- 700 Table S16. Conditions for previously published transcript profiling experiments
- 701 Table S17. Common genes differentially expressed between *fc2*, *flu*, and *chl* datasets.
- 702 Table S18. Common genes differentially expressed by treatment with  $\beta$ -cyclocitral
- 703 Table S19. *Early Singlet Oxygen Response Genes (ESORGs)* induced mutants
- 704 Table S20. Gene ontology analysis of unique up-regulated genes from mutants
- 705

## 706 **References**

- 707 1. Alamdari K, Fisher KE, Sinson AB, Chory J, Woodson JD (2020) Roles for the chloroplast-localized PPR  
708 Protein 30 and the "Mitochondrial" Transcription Termination Factor 9 in chloroplast quality control. *Plant*  
709 *J* 103:735-751
- 710 2. Alamdari K, Fisher KE, Tano DW, Rai S, Palos KR, Nelson ADL, Woodson JD (2021) Chloroplast quality  
711 control pathways are dependent on plastid DNA synthesis and nucleotides provided by cytidine  
712 triphosphate synthase two. *New Phytol* 231:1431-1448
- 713 3. Albrecht V, Ingenfeld A, Apel K (2008) Snowy cotyledon 2: the identification of a zinc finger domain  
714 protein essential for chloroplast development in cotyledons but not in true leaves. *Plant Mol Biol* 66:599-  
715 608
- 716 4. Alonso JM, Stepanova AN, Leisse TJ, Kim CJ, Chen H, Shinn P, Stevenson DK, Zimmerman J, Barajas P,  
717 Cheuk R, Gadrinab C, Heller C, Jeske A, Koesema E, Meyers CC, Parker H, Prednis L, Ansari Y, Choy N,  
718 Deen H, Geralt M, Hazari N, Hom E, Karnes M, Mulholland C, Ndubaku R, Schmidt I, Guzman P,  
719 Aguilar-Henonin L, Schmid M, Weigel D, Carter DE, Marchand T, Risseuw E, Brogden D, Zeko A,  
720 Crosby WL, Berry CC, Ecker JR (2003) Genome-wide insertional mutagenesis of *Arabidopsis thaliana*.  
721 *Science* 301:653-7

Tano, D. W. *et al.*, 2022

- 722 5. Apel K, Hirt H (2004) Reactive oxygen species: metabolism, oxidative stress, and signal transduction.  
723 *Annu Rev Plant Biol* 55:373-399
- 724 6. Asada K (2006) Production and scavenging of reactive oxygen species in chloroplasts and their functions.  
725 *Plant physiology* 141:391-396
- 726 7. Barkan A, Small I (2014) Pentatricopeptide repeat proteins in plants. *Annu Rev Plant Biol* 65:415-42
- 727 8. Baruah A, Simkova K, Apel K, Laloi C (2009) Arabidopsis mutants reveal multiple singlet oxygen  
728 signaling pathways involved in stress response and development. *Plant Mol Biol* 70:547-63
- 729 9. Boyle EI, Weng S, Gollub J, Jin H, Botstein D, Cherry JM, Sherlock G (2004) GO::TermFinder—open  
730 source software for accessing Gene Ontology information and finding significantly enriched Gene  
731 Ontology terms associated with a list of genes. *Bioinformatics* 20:3710-3715
- 732 10. Bruggemann E, Handwerker K, Essex C, Storz G (1996) Analysis of fast neutron-generated mutants at the  
733 *Arabidopsis thaliana* HY4 locus. *Plant J* 10:755-60
- 734 11. Callis J (2014) The ubiquitination machinery of the ubiquitin system. *The Arabidopsis book / American  
735 Society of Plant Biologists* 12:e0174
- 736 12. Camehl I, Drzewiecki C, Vadassery J, Shahollari B, Sherameti I, Forzani C, Munnik T, Hirt H, Oelmüller  
737 R (2011) The OXII kinase pathway mediates Piriformospora indica-induced growth promotion in  
738 *Arabidopsis*. *PLoS Pathog* 7:e1002051
- 739 13. Carmody M, Crisp PA, d'Alessandro S, Ganguly D, Gordon M, Havaux M, Albrecht-Borth V, Pogson BJ  
740 (2016) Uncoupling High Light Responses from Singlet Oxygen Retrograde Signaling and Spatial-Temporal  
741 Systemic Acquired Acclimation. *Plant Physiol* 171:1734-49
- 742 14. Chan KX, Mabbitt PD, Phua SY, Mueller JW, Nisar N, Gigolashvili T, Stroehrer E, Grassl J, Arlt W,  
743 Estavillo GM, Jackson CJ, Pogson BJ (2016) Sensing and signaling of oxidative stress in chloroplasts by  
744 inactivation of the SAL1 phosphoadenosine phosphatase. *Proc Natl Acad Sci U S A* 113:E4567-76
- 745 15. Chan KX, Phua SY, Crisp P, McQuinn R, Pogson BJ (2015) Learning the Languages of the Chloroplast:  
746 Retrograde Signaling and Beyond. *Annu Rev Plant Biol* 67:25-53
- 747 16. Chen S, Kim C, Lee JM, Lee HA, Fei Z, Wang L, Apel K (2015) Blocking the QB-binding site of  
748 photosystem II by tenuazonic acid, a non-host-specific toxin of *Alternaria alternata*, activates singlet  
749 oxygen-mediated and EXECUTER-dependent signalling in *Arabidopsis*. *Plant Cell Environ* 38:1069-80
- 750 17. Choudhury FK, Rivero RM, Blumwald E, Mittler R (2017) Reactive oxygen species, abiotic stress and  
751 stress combination. *Plant J* 90:856-867
- 752 18. D'Alessandro S, Beaugelin I, Havaux M (2020) Tanned or Sunburned: How Excessive Light Triggers Plant  
753 Cell Death. *Molecular Plant* 13:1545-1555
- 754 19. Danon A, Coll NS, Apel K (2006) Cryptochrome-1-dependent execution of programmed cell death induced  
755 by singlet oxygen in *Arabidopsis thaliana* (vol 103, pg 17036, 2006). *Proceedings of the National Academy  
756 of Sciences of the United States of America* 103:18875-18875
- 757 20. Dogra V, Duan J, Lee KP, Lv S, Liu R, Kim C (2017) FtsH2-Dependent Proteolysis of EXECUTER1 Is  
758 Essential in Mediating Singlet Oxygen-Triggered Retrograde Signaling in *Arabidopsis thaliana*. *Front Plant  
759 Sci* 8:1145
- 760 21. Dogra V, Kim C (2019) Singlet Oxygen Metabolism: From Genesis to Signaling. *Front Plant Sci* 10:1640
- 761 22. Dogra V, Li M, Singh S, Li M, Kim C (2019) Oxidative post-translational modification of EXECUTER1 is  
762 required for singlet oxygen sensing in plastids. *Nat Commun* 10:2834
- 763 23. Dogra V, Singh RM, Li M, Li M, Singh S, Kim C (2022) EXECUTER2 modulates the EXECUTER1  
764 signalosome through its singlet oxygen-dependent oxidation. *Mol Plant* 15:438-453
- 765 24. Fisher KE, Krishnamoorthy P, Joens MS, Chory J, Fitzpatrick JAJ, Woodson JD (2022) Singlet Oxygen  
766 Leads to Structural Changes to Chloroplasts During their Degradation in the *Arabidopsis thaliana* plastid  
767 ferrochelatase two Mutant. *Plant and Cell Physiology* 63:248-264
- 768 25. Foyer CH (2018) Reactive oxygen species, oxidative signaling and the regulation of photosynthesis.  
769 *Environ Exp Bot* 154:134-142
- 770 26. Havaux M, Dall'osto L, Bassi R (2007) Zeaxanthin has enhanced antioxidant capacity with respect to all  
771 other xanthophylls in *Arabidopsis* leaves and functions independent of binding to PSII antennae. *Plant  
772 Physiol* 145:1506-20
- 773 27. Jeran N, Rotasperti L, Frabetti G, Calabritto A, Pesaresi P, Tadini L (2021) The PUB4 E3 Ubiquitin Ligase  
774 Is Responsible for the Variegated Phenotype Observed upon Alteration of Chloroplast Protein Homeostasis  
775 in *Arabidopsis* Cotyledons. *Genes (Basel)* 12:

Tano, D. W. *et al.*, 2022

- 776 28. Kikuchi Y, Nakamura S, Woodson JD, Ishida H, Ling Q, Hidema J, Jarvis RP, Hagihara S, Izumi M (2020)  
777 Chloroplast Autophagy and Ubiquitination Combine to Manage Oxidative Damage and Starvation  
778 Responses. *Plant Physiol* 183:1531-1544
- 779 29. Kim C, Meskauskiene R, Zhang S, Lee KP, Lakshmanan Ashok M, Blajicka K, Herrfurth C, Feussner I,  
780 Apel K (2012) Chloroplasts of *Arabidopsis* are the source and a primary target of a plant-specific  
781 programmed cell death signaling pathway. *The Plant cell* 24:3026-39
- 782 30. Kleinboelting N, Huet G, Kloetgen A, Viehoveer P, Weisshaar B (2012) GABI-Kat SimpleSearch: new  
783 features of the *Arabidopsis thaliana* T-DNA mutant database. *Nucleic acids research* 40:D1211-5
- 784 31. Lee KP, Kim C, Landgraf F, Apel K (2007) EXECUTER1- and EXECUTER2-dependent transfer of stress-  
785 related signals from the plastid to the nucleus of *Arabidopsis thaliana*. *Proc Natl Acad Sci U S A*  
786 104:10270-5
- 787 32. Lemke MD, Fisher EM, Kozłowska MA, Tano DW, Woodson JD (2021) The core autophagy machinery is  
788 not required for chloroplast singlet oxygen-mediated cell death in the *Arabidopsis* plastid ferrochelatase  
789 two mutant. *BMC Plant Biology* 21:342
- 790 33. Lu Y, Yao J (2018) Chloroplasts at the Crossroad of Photosynthesis, Pathogen Infection and Plant Defense.  
791 *Int J Mol Sci* 19:3900
- 792 34. Mach JM, Castillo AR, Hoogstraten R, Greenberg JT (2001) The *Arabidopsis*-accelerated cell death gene  
793 ACD2 encodes red chlorophyll catabolite reductase and suppresses the spread of disease symptoms. *Proc*  
794 *Natl Acad Sci U S A* 98:771-6
- 795 35. Meskauskiene R, Nater M, Goslings D, Kessler F, op den Camp R, Apel K (2001) FLU: a negative  
796 regulator of chlorophyll biosynthesis in *Arabidopsis thaliana*. *Proc Natl Acad Sci U S A* 98:12826-31
- 797 36. Mittler R (2017) ROS Are Good. *Trends Plant Sci* 22:11-19
- 798 37. Mohapatra A, Tripathy BC (2002) Detection of protoporphyrin IX in envelope membranes of pea  
799 chloroplasts. *Biochem Biophys Res Commun* 299:751-4
- 800 38. Mohapatra A, Tripathy BC (2007) Differential distribution of chlorophyll biosynthetic intermediates in  
801 stroma, envelope and thylakoid membranes in *Beta vulgaris*. *Photosynth Res* 94:401-10
- 802 39. Noctor G, Mhamdi A, Foyer CH (2014) The roles of reactive oxygen metabolism in drought: not so cut and  
803 dried. *Plant Physiol* 164:1636-48
- 804 40. Noctor G, Reichheld JP, Foyer CH (2018) ROS-related redox regulation and signaling in plants. *Semin*  
805 *Cell Dev Biol* 80:3-12
- 806 41. Ogilby PR (2010) Singlet oxygen: there is indeed something new under the sun. *Chemical Society reviews*  
807 39:3181-209
- 808 42. Oliveros JC ((2007-2015)) Venny. An interactive tool for comparing lists with Venn's diagrams.  
809 <https://bioinfogp.cnb.csic.es/tools/venny/index.html>
- 810 43. op den Camp RG, Przybyla D, Ochsenbein C, Laloi C, Kim C, Danon A, Wagner D, Hideg E, Gobel C,  
811 Feussner I, Nater M, Apel K (2003) Rapid induction of distinct stress responses after the release of singlet  
812 oxygen in *Arabidopsis*. *Plant Cell* 15:2320-2332
- 813 44. Page MT, Kacprzak SM, Mochizuki N, Okamoto H, Smith AG, Terry MJ (2017) Seedlings Lacking the  
814 PTM Protein Do Not Show a genomes uncoupled (gun) Mutant Phenotype. *Plant Physiol* 174:21-26
- 815 45. Page MT, McCormac AC, Smith AG, Terry MJ (2017) Singlet oxygen initiates a plastid signal controlling  
816 photosynthetic gene expression. *New Phytol* 213:1168-1180
- 817 46. Papenbrock J, Mishra S, Mock HP, Kruse E, Schmidt EK, Petersmann A, Braun HP, Grimm B (2001)  
818 Impaired expression of the plastidic ferrochelatase by antisense RNA synthesis leads to a necrotic  
819 phenotype of transformed tobacco plants. *Plant J* 28:41-50
- 820 47. Pattanayak GK, Venkataramani S, Hortensteiner S, Kunz L, Christ B, Moulin M, Smith AG, Okamoto Y,  
821 Tamiaki H, Sugishima M, Greenberg JT (2012) Accelerated cell death 2 suppresses mitochondrial  
822 oxidative bursts and modulates cell death in *Arabidopsis*. *Plant J* 69:589-600
- 823 48. Pospíšil P (2016) Production of Reactive Oxygen Species by Photosystem II as a Response to Light and  
824 Temperature Stress. *Frontiers in Plant Science* 7:
- 825 49. Pruzinská A, Anders I, Aubry S, Schenk N, Tapernoux-Lüthi E, Müller T, Kräutler B, Hörtensteiner S  
826 (2007) In vivo participation of red chlorophyll catabolite reductase in chlorophyll breakdown. *Plant Cell*  
827 19:369-87
- 828 50. Ramel F, Birtic S, Ginies C, Soubigou-Taconnat L, Triantaphylides C, Havaux M (2012) Carotenoid  
829 oxidation products are stress signals that mediate gene responses to singlet oxygen in plants. *Proceedings of*  
830 *the National Academy of Sciences of the United States of America* 109:5535-40

Tano, D. W. *et al.*, 2022

- 831 51. Ramel F, Ksas B, Akkari E, Mialoundama AS, Monnet F, Krieger-Liszkay A, Ravanat JL, Mueller MJ,  
832 Bouvier F, Havaux M (2013) Light-induced acclimation of the Arabidopsis chlorinal mutant to singlet  
833 oxygen. *The Plant cell* 25:1445-62
- 834 52. Rentel MC, Lecourieux D, Ouaked F, Usher SL, Petersen L, Okamoto H, Knight H, Peck SC, Grierson CS,  
835 Hirt H, Knight MR (2004) OXII kinase is necessary for oxidative burst-mediated signalling in Arabidopsis.  
836 *Nature* 427:858-61
- 837 53. Rosenwasser S, Fluhr R, Joshi JR, Leviatan N, Sela N, Hetzroni A, Friedman H (2013) ROSMETER: a  
838 bioinformatic tool for the identification of transcriptomic imprints related to reactive oxygen species type  
839 and origin provides new insights into stress responses. *Plant Physiol* 163:1071-83
- 840 54. Shin J, Kim K, Kang H, Zulfugarov IS, Bae G, Lee CH, Lee D, Choi G (2009) Phytochromes promote  
841 seedling light responses by inhibiting four negatively-acting phytochrome-interacting factors. *Proceedings*  
842 *of the National Academy of Sciences of the United States of America* 106:7660-5
- 843 55. Shumbe L, Bott R, Havaux M (2014) Dihydroactinidiolide, a high light-induced beta-carotene derivative  
844 that can regulate gene expression and photoacclimation in Arabidopsis. *Mol Plant* 7:1248-51
- 845 56. Shumbe L, Chevalier A, Legeret B, Tacconat L, Monnet F, Havaux M (2016) Singlet Oxygen-Induced Cell  
846 Death in Arabidopsis under High-Light Stress Is Controlled by OXII Kinase. *Plant Physiol* 170:1757-71
- 847 57. Shumbe L, D'Alessandro S, Shao N, Chevalier A, Ksas B, Bock R, Havaux M (2017) METHYLENE  
848 BLUE SENSITIVITY 1 (MBS1) is required for acclimation of Arabidopsis to singlet oxygen and acts  
849 downstream of beta-cyclocitral. *Plant Cell Environ* 40:216-226
- 850 58. Suo J, Zhao Q, David L, Chen S, Dai S (2017) Salinity Response in Chloroplasts: Insights from Gene  
851 Characterization. *Int J Mol Sci* 18:1011
- 852 59. Supek F, Bošnjak M, Škunca N, Šmuc T (2011) REVIGO summarizes and visualizes long lists of gene  
853 ontology terms. *PLoS One* 6:e21800
- 854 60. Triantaphylides C, Krischke M, Hoeberichts FA, Ksas B, Gresser G, Havaux M, Van Breusegem F,  
855 Mueller MJ (2008) Singlet oxygen is the major reactive oxygen species involved in photooxidative damage  
856 to plants. *Plant physiology* 148:960-8
- 857 61. Uberegui E, Hall M, Lorenzo O, Schroder WP, Balsera M (2015) An Arabidopsis soluble chloroplast  
858 proteomic analysis reveals the participation of the Executer pathway in response to increased light  
859 conditions. *J Exp Bot* 66:2067-77
- 860 62. Wagner D, Przybyla D, Op den Camp R, Kim C, Landgraf F, Lee KP, Wursch M, Laloi C, Nater M, Hideg  
861 E, Apel K (2004) The genetic basis of singlet oxygen-induced stress responses of Arabidopsis thaliana.  
862 *Science* 306:1183-5
- 863 63. Wang L, Kim C, Xu X, Piskurewicz U, Dogra V, Singh S, Mahler H, Apel K (2016) Singlet oxygen- and  
864 EXECUTER1-mediated signaling is initiated in grana margins and depends on the protease FtsH2. *Proc*  
865 *Natl Acad Sci U S A* 113:E3792-800
- 866 64. Wang LS, Leister D, Guan L, Zheng Y, Schneider K, Lehmann M, Apel K, Kleine T (2020) The  
867 Arabidopsis SAFEGUARD1 suppresses singlet oxygen-induced stress responses by protecting grana  
868 margins. *Proceedings of the National Academy of Sciences of the United States of America* 117:6918-6927
- 869 65. Wang Y, Wu Y, Zhong H, Chen S, Wong KB, Xia Y (2022) Arabidopsis PUB2 and PUB4 connect  
870 signaling components of pattern-triggered immunity. *New Phytol* 233:2249-2265
- 871 66. Warren CR (2008) Rapid Measurement of Chlorophylls with a Microplate Reader. *Journal of Plant*  
872 *Nutrition* 31:1231-1332
- 873 67. Wobbe L (2020) The molecular function of plant mTERFs as key regulators of organellar gene expression.  
874 *Plant and Cell Physiology* 61:2004-2017
- 875 68. Woodson JD (2019) Chloroplast stress signals: regulation of cellular degradation and chloroplast turnover.  
876 *Curr Opin Plant Biol* 52:30-37
- 877 69. Woodson JD (2022) Control of chloroplast degradation and cell death in response to stress. *Trends*  
878 *Biochem Sci*
- 879 70. Woodson JD, Joens MS, Sinson AB, Gilkerson J, Salome PA, Weigel D, Fitzpatrick JA, Chory J (2015)  
880 Ubiquitin facilitates a quality-control pathway that removes damaged chloroplasts. *Science* 350:450-4
- 881 71. Woodson JD, Perez-Ruiz JM, Chory J (2011) Heme synthesis by plastid ferrochelatase I regulates nuclear  
882 gene expression in plants. *Curr Biol* 21:897-903
- 883
- 884

## 885 Statements and Declarations

Tano, D. W. *et al.*, 2022

886 The authors report no conflict of interest

887

888 **Figures**

889

890 Figure 1. Meta-analysis of transcriptome expression data from three chloroplast  $^1\text{O}_2$ -producing mutant backgrounds.

891 Transcriptome datasets from three *Arabidopsis thaliana*  $^1\text{O}_2$ -producing mutants were analyzed; *fc2* (Woodson et al.  
892 2015), *flu* (op den Camp et al. 2003), and *chl* (Ramel et al. 2013). Shown are Venn diagrams of differentially expressed  
893 genes (DEGs) **A**) up-regulated or **B**) down-regulated during chloroplast  $^1\text{O}_2$  stress in *fc2*, *flu*, and *chl*. A  $\geq 2$ -fold  
894 change and  $\leq 0.05$  adjusted p-value cutoffs were applied for all datasets where applicable. Additional information on  
895 the experiments are provided in Table S16. Tables S11 and 12 list the DEGs. Within each circle are the number of  
896 shared DEGs and the percentage of total DEGs (1,633) from the analysis.

897

898 Figure 2. Genetic analysis of singlet oxygen signaling in *fc2* mutant seedlings.

899 Genetic suppressors of  $^1\text{O}_2$ -producing mutants were tested for their ability to suppress the stress phenotypes of *fc2*  
900 seedlings. **A**) Shown are six-day-old seedlings grown under constant light (24 h) or diurnal cycling light (6 h light /  
901 18 h dark) conditions. **B**) Shown are representative trypan blue stains of these seedlings. The dark blue color is  
902 indicative of cell death. **C**) Shown are mean intensities of trypan blue ( $\pm$  SE,  $n \geq 4$  seedlings) from **B**. **D**) RT-qPCR  
903 analysis of stress gene markers of four-day-old seedlings grown under 6 h light / 18 h dark conditions harvested 1 h  
904 after dawn. Shown are mean expression values ( $\pm$  SE,  $n = 3$  biological replicates). Statistical analyses in **C** and **D**  
905 were performed using a one-way ANOVA followed by a Tukey HSD test. Statistical significance in respect to wt is  
906 indicated as follows: n.s. = p-value  $\geq 0.05$ , \* = p-value  $\leq 0.05$ , \*\* = p-value  $\leq 0.01$ , \*\*\* = p-value  $\leq 0.001$ . **E**) Mean  
907 levels of total chlorophyll (per seedling) of seven-day-old seedlings grown in 24 h light ( $\pm$  SE,  $n = 3$  replicates). **F**)  
908 Mean levels of protochlorophyllide (Pchl) of four-day-old dark grown (etiolated) seedlings ( $\pm$  SE,  $n = 3$   
909 replicates). **G**) Shown are representative images of four-day-old seedlings stained with Singlet Oxygen Sensor Green  
910 (SOSG). Seedlings were grown for three days in 6 h light / 18 h dark diurnal light cycling conditions, dark incubated  
911 at the end of day three, and re-exposed to light on day four. Pictures were acquired 3 h post-dawn. **H**) Shown are mean  
912 SOSG intensities ( $\pm$  SE,  $n \geq 12$  seedlings) of these seedlings. Statistical analyses in **E**, **F**, and **H** were performed

Tano, D. W. *et al.*, 2022

913 using a one-way ANOVA followed by a Tukey HSD test. Different letters indicate statistical differences ( $p \leq 0.05$ ).

914 In bar graphs, closed circles represent individual data points.

915

916 Figure 3. Genetic analysis of singlet oxygen signaling in *fc2* mutant adult plants.

917 Genetic suppressors of  $^1\text{O}_2$ -signaling were tested for their ability to suppress the cell death phenotype of *fc2* adult

918 plants. **A)** Shown are representative 27-day-old plants grown under constant light (24 h) or under 24 h light for 21

919 days and then shifted to diurnal cycling light conditions (16 h light / 8 h dark) for 6 additional days. White arrows

920 indicate lesions. **B)** Shown are representative trypan blue cell death stains for both sets of plants. The dark blue color

921 is indicative of cell death. **C)** Shown are mean intensities of trypan blue (+/- SE,  $n \geq 3$  leaves) from **B**. Statistical

922 analyses within each light treatment were performed using a one-way ANOVA followed by a Tukey HSD test.

923 Statistical significance in respect to wt is indicated as follows: \*\* =  $p$ -value  $\leq 0.01$ , \*\*\* =  $p$ -value  $\leq 0.001$ , not

924 significant (ns) =  $p$ -value  $\geq 0.05$ . Closed circles represent individual data points.

925

926 Figure 4. Genetic analysis of singlet oxygen signaling in *flu* seedlings.

927 Genetic suppressors of chloroplast  $^1\text{O}_2$  signaling were tested for their ability to suppress *flu* phenotypes in seedlings.

928 **A)** Shown are (top) six-day-old seedlings grown under constant light (24 h) and (bottom) five-day-old seedlings grown

929 under 24 h light, incubated in the dark for 12 h, and re-exposed to light for 36 h (7 days total). **B)** Shown are

930 representative images of these seedlings stained with trypan blue. The dark blue color is indicative of cell death. **C)**

931 Mean intensities of trypan blue signal (+/- SE,  $n \geq 9$  seedlings) from panel **B**. **D)** RT-qPCR of *flu*-specific stress gene

932 markers of five-day-old seedlings grown under 24 h constant light then dark-incubated for 12 h, harvested 1 h after

933 re-exposure to light. Shown are mean expression values (+/- SE,  $n \geq 3$  biological replicates). Statistical analyses were

934 performed using a one-way ANOVA followed by a Tukey HSD test. Statistical significance in respect to wt is

935 indicated as follows: n.s. =  $p$ -value  $\geq 0.05$ , \* =  $p$ -value  $\leq 0.05$ , \*\* =  $p$ -value  $\leq 0.01$ , \*\*\* =  $p$ -value  $\leq 0.001$ . Closed

936 circles represent individual data points.

937

938 Figure 5. Genetic analysis of  $^1\text{O}_2$  signaling in adult *flu* plants

939 Genetic suppressors of  $^1\text{O}_2$ -signaling were tested for their ability to suppress the *flu* cell death phenotype in adult

940 plants. **A)** Shown are representative 24-day-old plants grown under constant light (24 h) and 21-day-old plants grown



Tano, D. W. *et al.*, 2022

941 in 24 h light and then shifted to diurnal cycling light (16 h light / 8 h dark) conditions for three days (24 days old total).  
942 White arrows indicate lesions. **B)** Shown are representative images of leaves from these plants stained with trypan  
943 blue. The dark blue color is indicative of cell death. **C)** Shown are mean intensities of trypan blue (+/- SE,  $n \geq 3$  leaves)  
944 from **B**. Statistical analyses within each light treatment were performed using a one-way ANOVA followed by a Tukey  
945 HSD test. Statistical significance in respect to *flu* is indicated as follows: \*\* = p-value  $\leq 0.01$ , \*\*\* = p-value  $\leq 0.001$ ,  
946 not significant (ns) = p-value  $\geq 0.05$ . Closed circles represent individual data points.

947

948 Figure 6. Effect of singlet oxygen signaling mutations on excess light-induced phenotypes.

949 The effect of the *oxil* and *pub4-6* mutations were tested in excess light (EL) conditions. **A)** Time course analysis of  
950 maximum PSII quantum efficiency ( $F_v/F_m$ ) in seven-day-old seedlings during 24 h of EL (1,200  $\mu\text{mol photons sec}^{-1}$   
951  $\text{m}^{-2}$ ) at 10°C (+/- SE,  $n \geq 3$  groups of seedlings). **B)** Shown are representative seedlings immediately after the indicated  
952 length of EL treatment. **C)** Time course analysis of  $F_v/F_m$  in 18-day-old adult plants during 48 h of EL (1,300  $\mu\text{mol}$   
953  $\text{photons sec}^{-1} \text{m}^{-2}$  (+/- SE,  $n \geq 6$  plants). Statistical analyses within each time point (for wt or *chl*) were performed  
954 using a one-way ANOVA followed by a Tukey HSD test. Statistical significance in respect to wt (for *oxil* and *pub4-*  
955 *6*) or *chl* (for *chl oxil* and *chl pub4-6*) is indicated as follows: \* = p-value  $\leq 0.05$ , \*\* = p-value  $\leq 0.01$ , \*\*\* = p-value  
956  $\leq 0.001$ , not significant (ns) = p-value  $\geq 0.05$ .

957

958 Figure 7. The *pub4-6* mutation slows the progression of spontaneous cell death in the *acd2-2* mutant.

959 The *acd2* spontaneous cell death and lesion phenotypes were assessed. **A)** Shown are representative 30-day-old adult  
960 plants grown under 16 h light / 8 h dark diurnal cycling light conditions. The inflorescences were removed for the  
961 picture. White arrows indicate lesions. **B)** Mean number of leaves with lesions per plant (+/- SE,  $n \geq 18$  plants).  
962 Statistical analyses were performed for each time point using a one-way ANOVA followed by a Tukey HSD test.  
963 Statistical significance as follows in respect to wt: \*\* = p-value  $\leq 0.01$ , \*\*\* = p-value  $\leq 0.001$ .

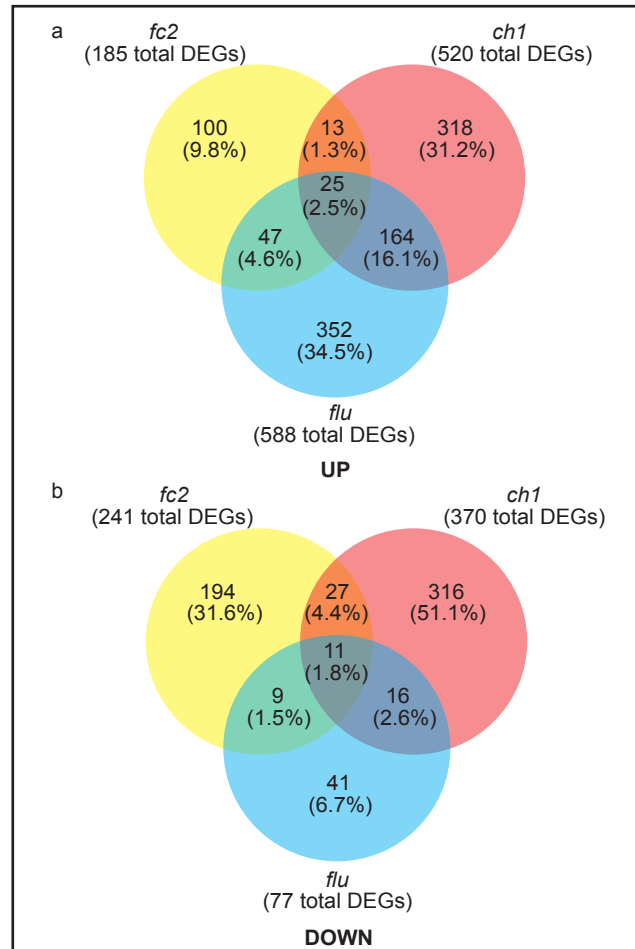

Tano et al. Figure 1

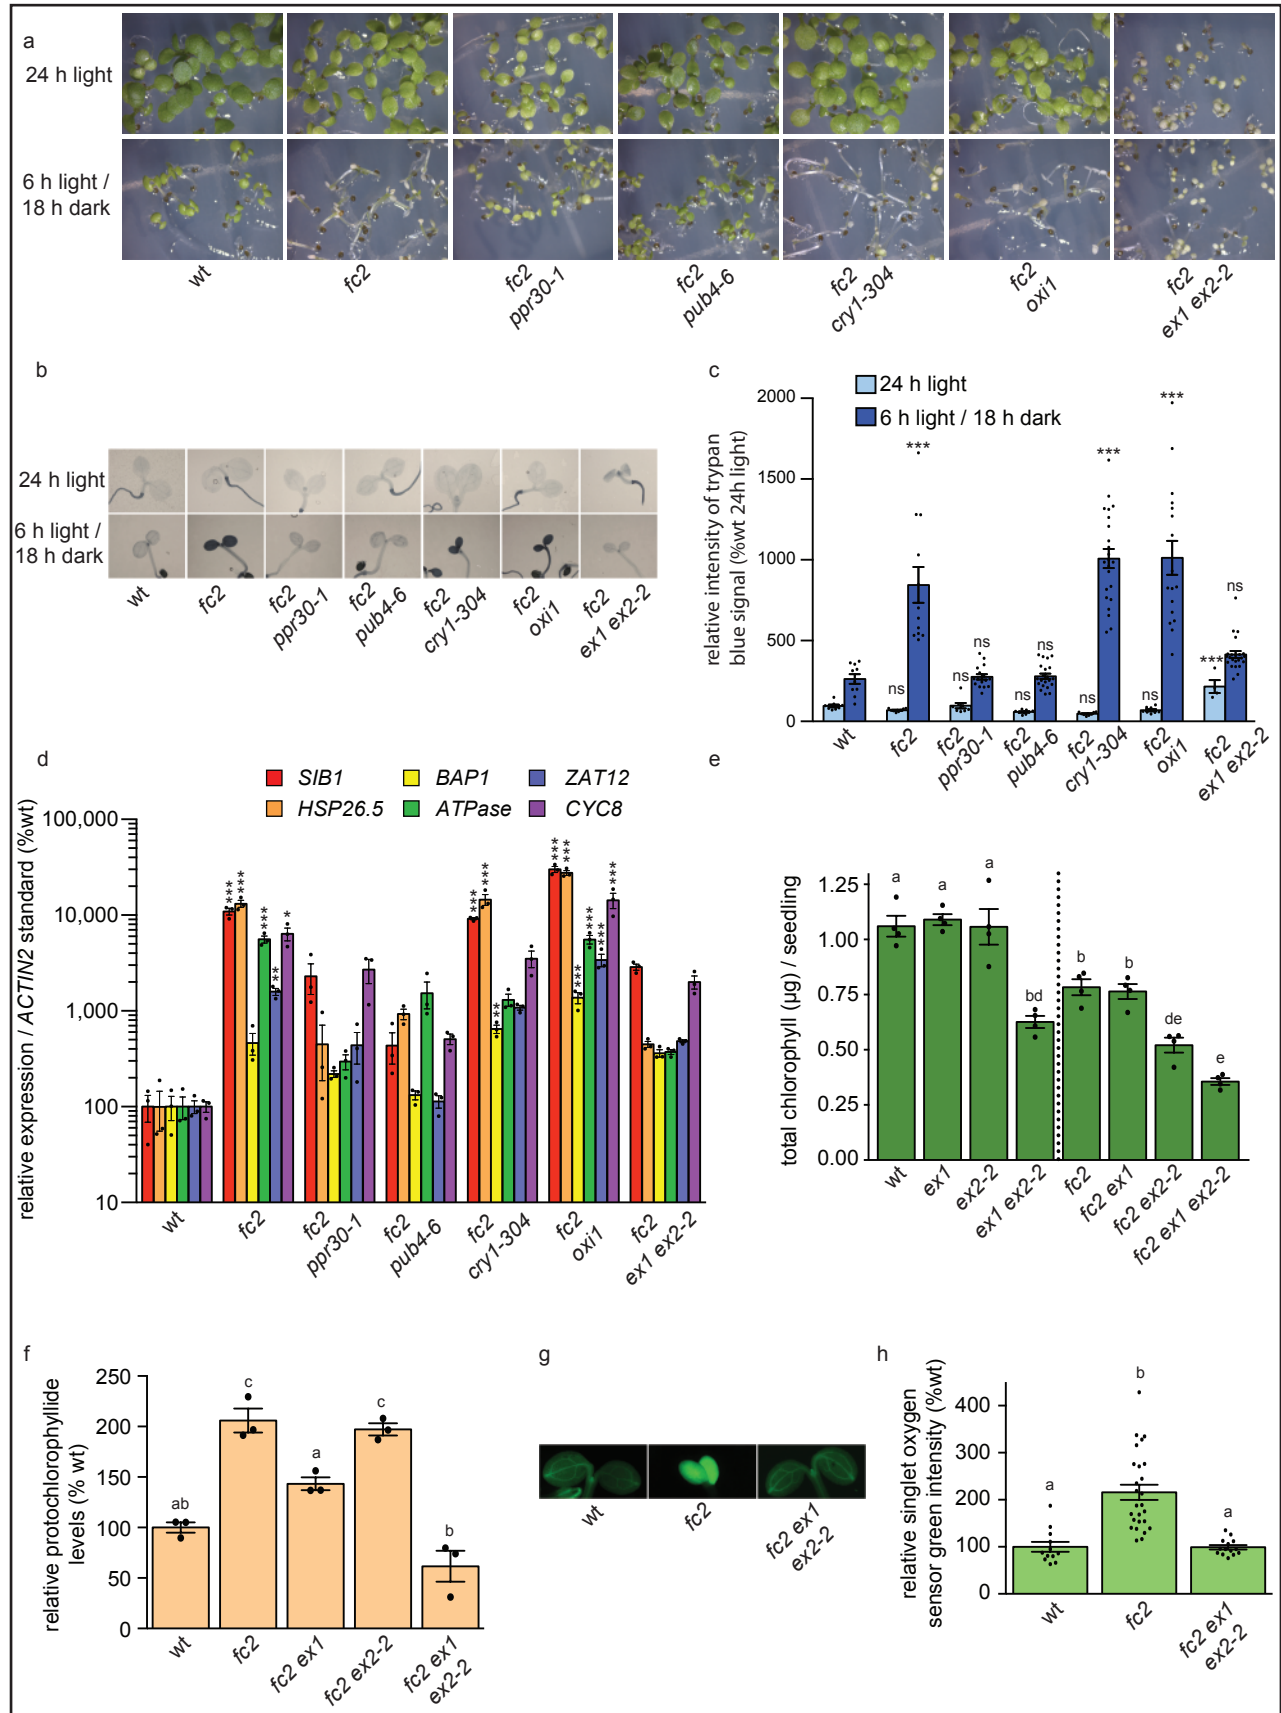

Tano et al. Figure 2

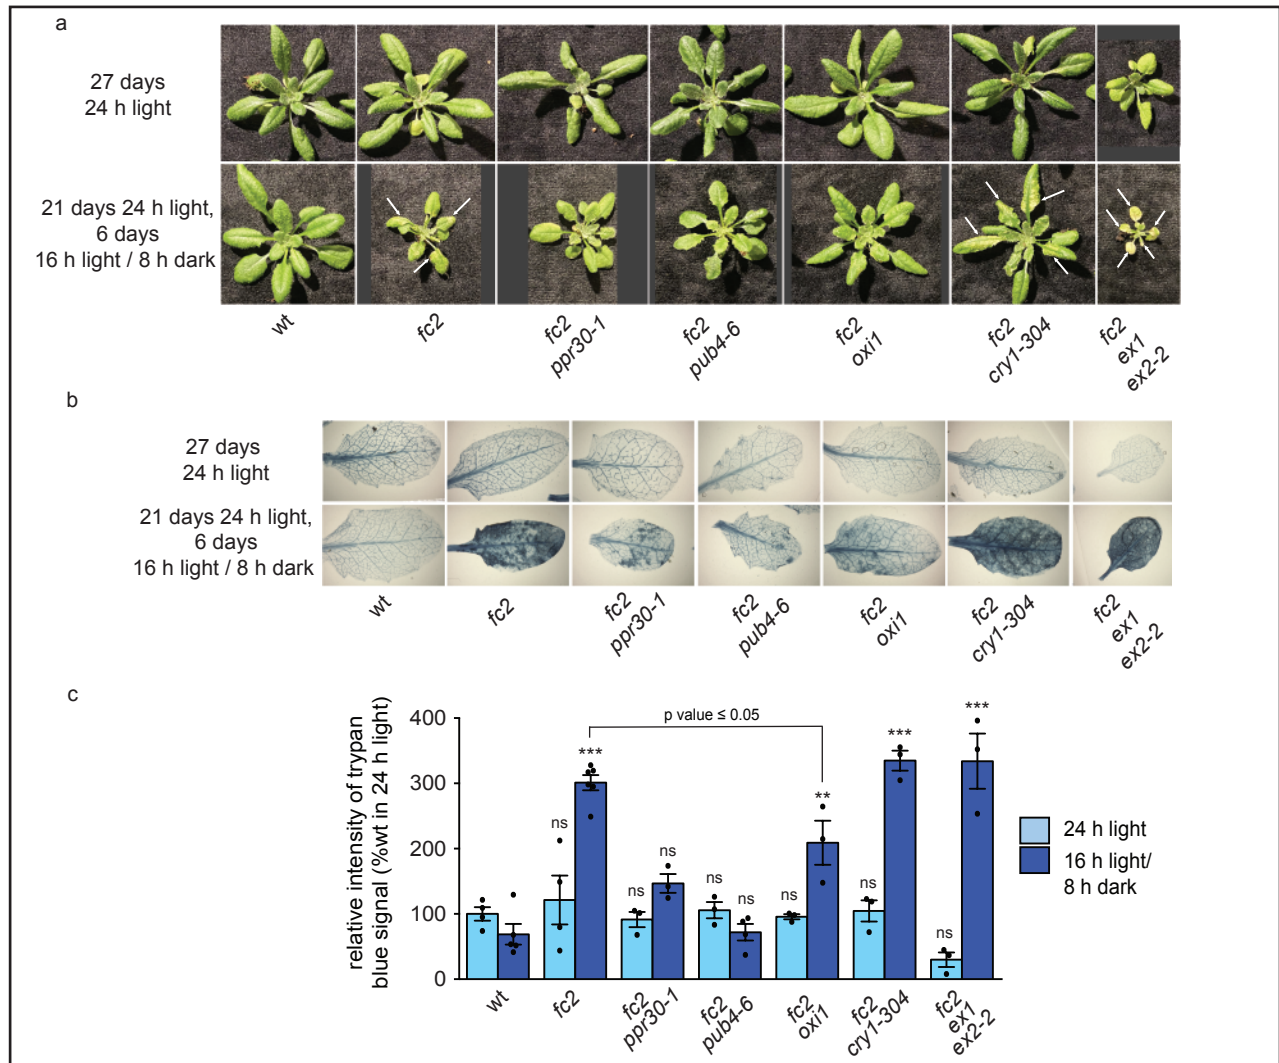

Tano et al. Figure 3

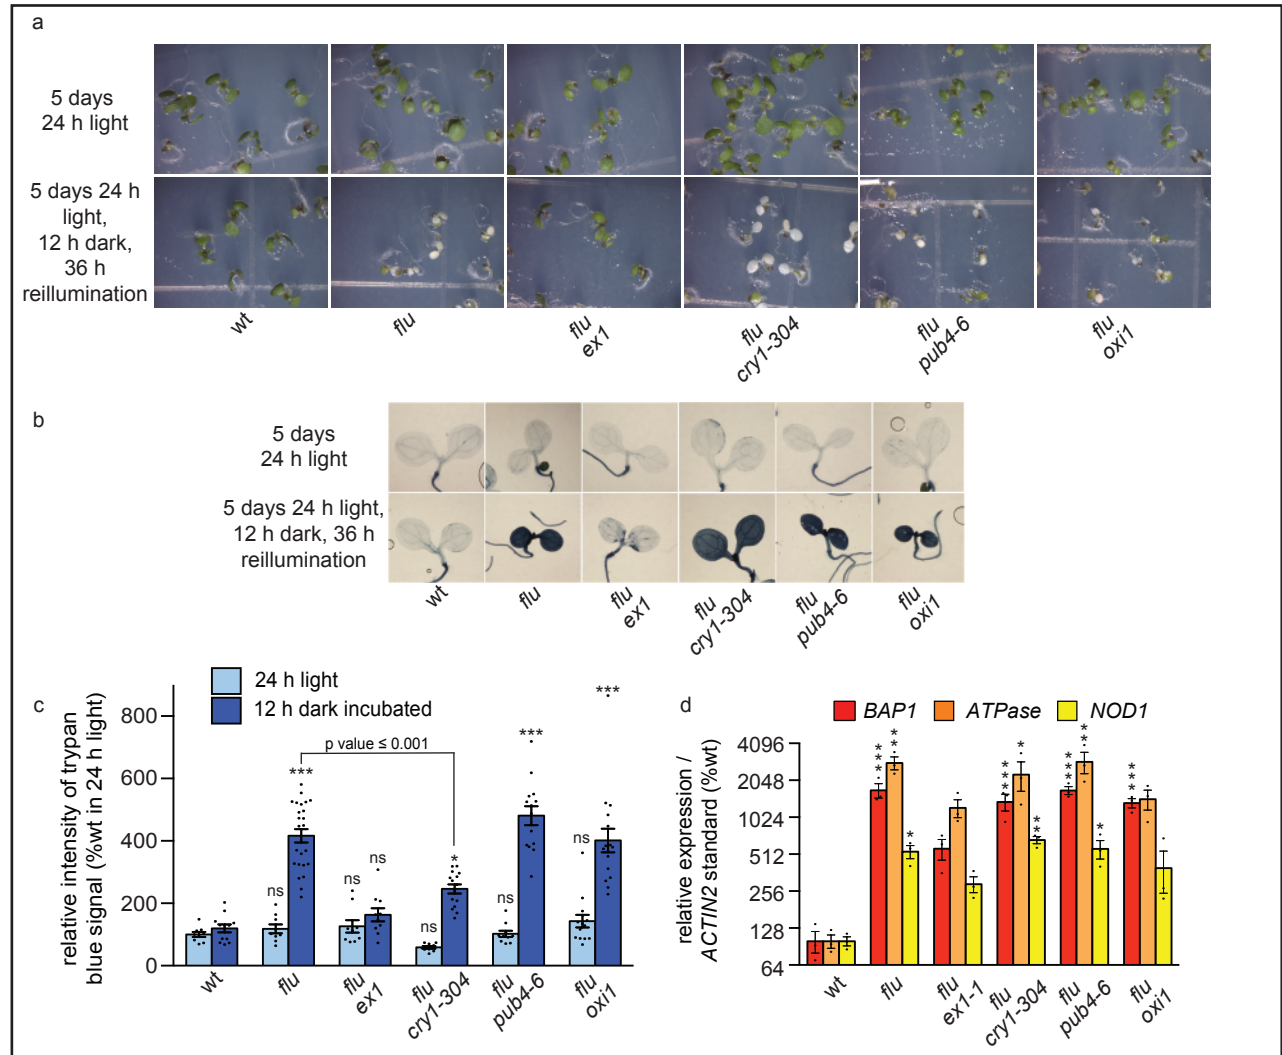

Tano et al. Figure 4

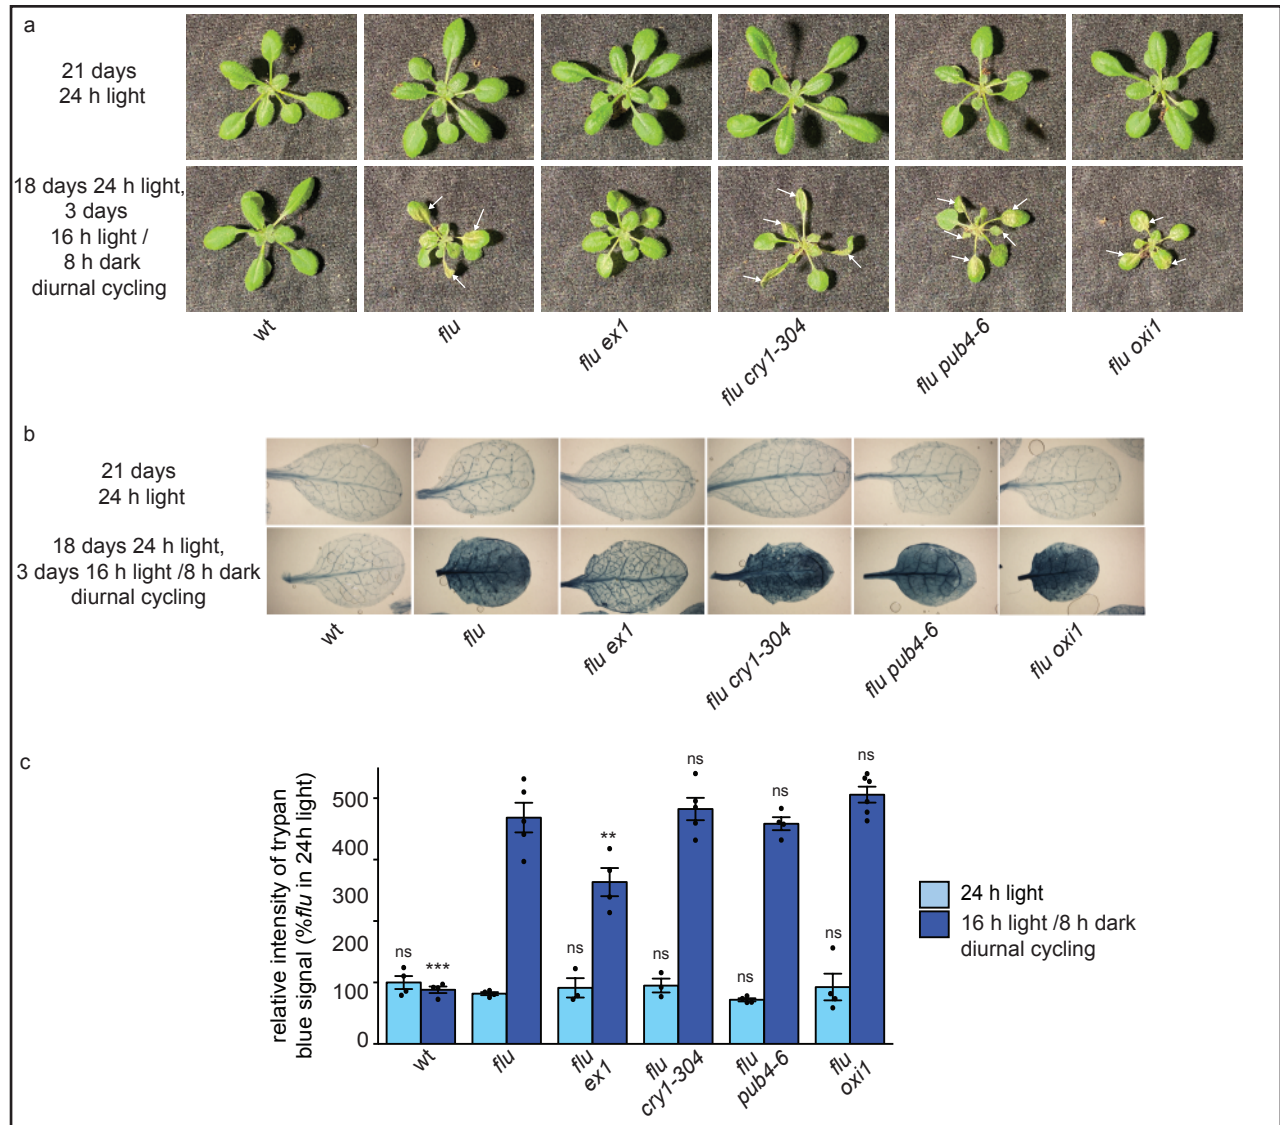

Tano et al. Figure 5

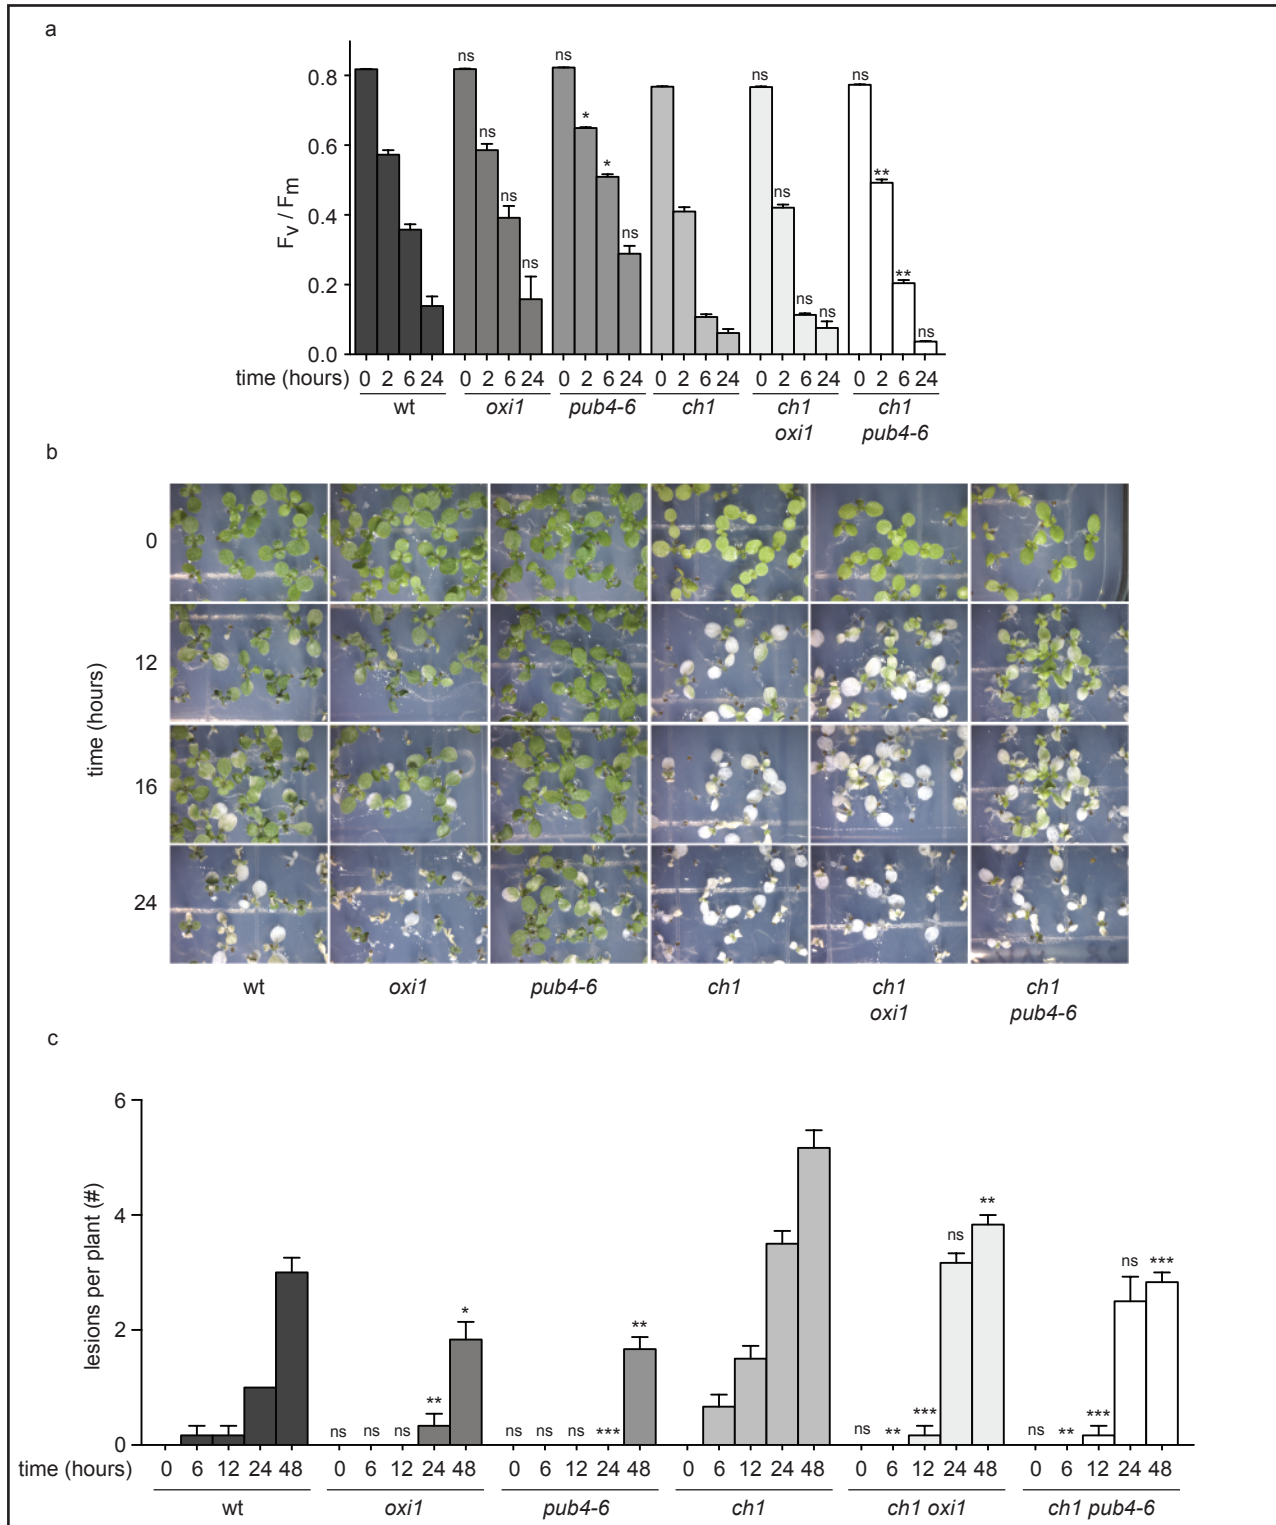

Tano et al. Figure 6

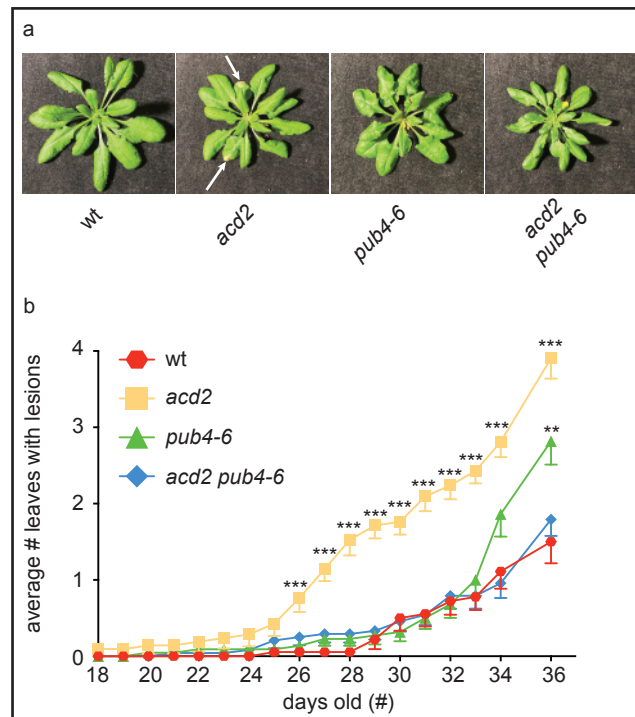

Tano et al. Figure 7
